# Supplementary material for: HMGB1 Protein Interactions in Prostate and Ovary Cancer Models Reveal Links to RNA Processing and Ribosome Biogenesis through NuRD, THOC and Septin Complexes
Source: MDPI journal article supplement (doi:10.3390/cancers13184686), 2021-09-18
Supplement: s1 [file s1]

# Supplementary Material: HMGB1 Protein Interactions in Prostate and Ovary Cancer Models Reveal Links to RNA Processing and Ribosome Biogenesis through NuRD, THOC and Septin Complexes

Aida Barreiro-Alonso, Mónica Lamas-Maceiras, Lidia Lorenzo-Catoira, Mercedes Pardo, Lu Yu, Jyoti S. Choudhary and M. Esperanza Cerdán

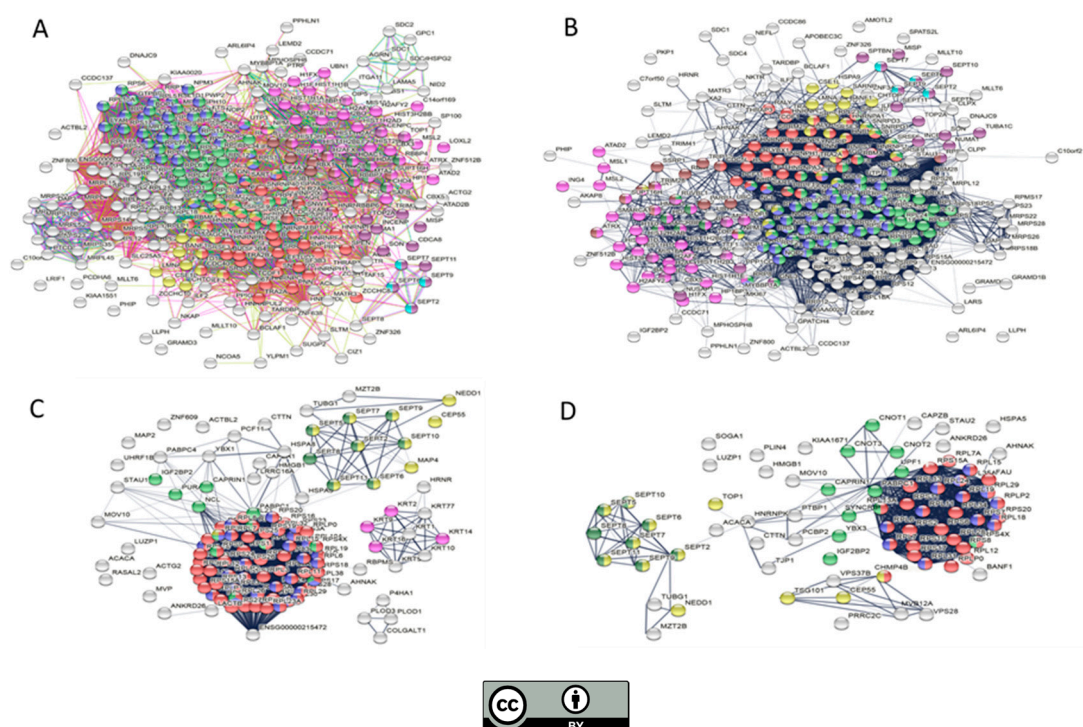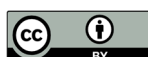

**Copyright:** © 2021 by the authors. Licensee MDPI, Basel, Switzerland. This article is an open access article distributed under the terms and conditions of the Creative Commons Attribution (CC BY) license (<http://creativecommons.org/licenses/by/4.0/>).

**Figure S1.** Clustering of proteins that interact with HMGB1 in SKOV-3 and PC-3 cells. (A) in the nuclear fraction of SKOV-3, (B) in the nuclear fraction of PC-3, (C) in the cytoplasmic fraction of SKOV-3, (D) in the cytoplasmic fraction of PC-3. Color code in A and B is as follows: red, mRNA splicing, via spliceosome; dark blue, rRNA processing; green, ribonucleo-protein complex biogenesis; yellow, nuclear transport; pink, chromatin organization; purple cell division; brown, DNA repair; dark green, NuRD complex. Color code in C and D is as follows: red, SRP-dependent co-translational protein targeting to membrane; blue, cytoplasmic translation; green, regulation of translation; yellow, cell division; dark green, septins; pink, intermediate filament cytoskeleton organization. The interactome of HMGB1 partners, reflecting only experimental or data-base recorded interactions, has been constructed with STRING (<https://string-db.org/>, Accessed 10 February 2021).

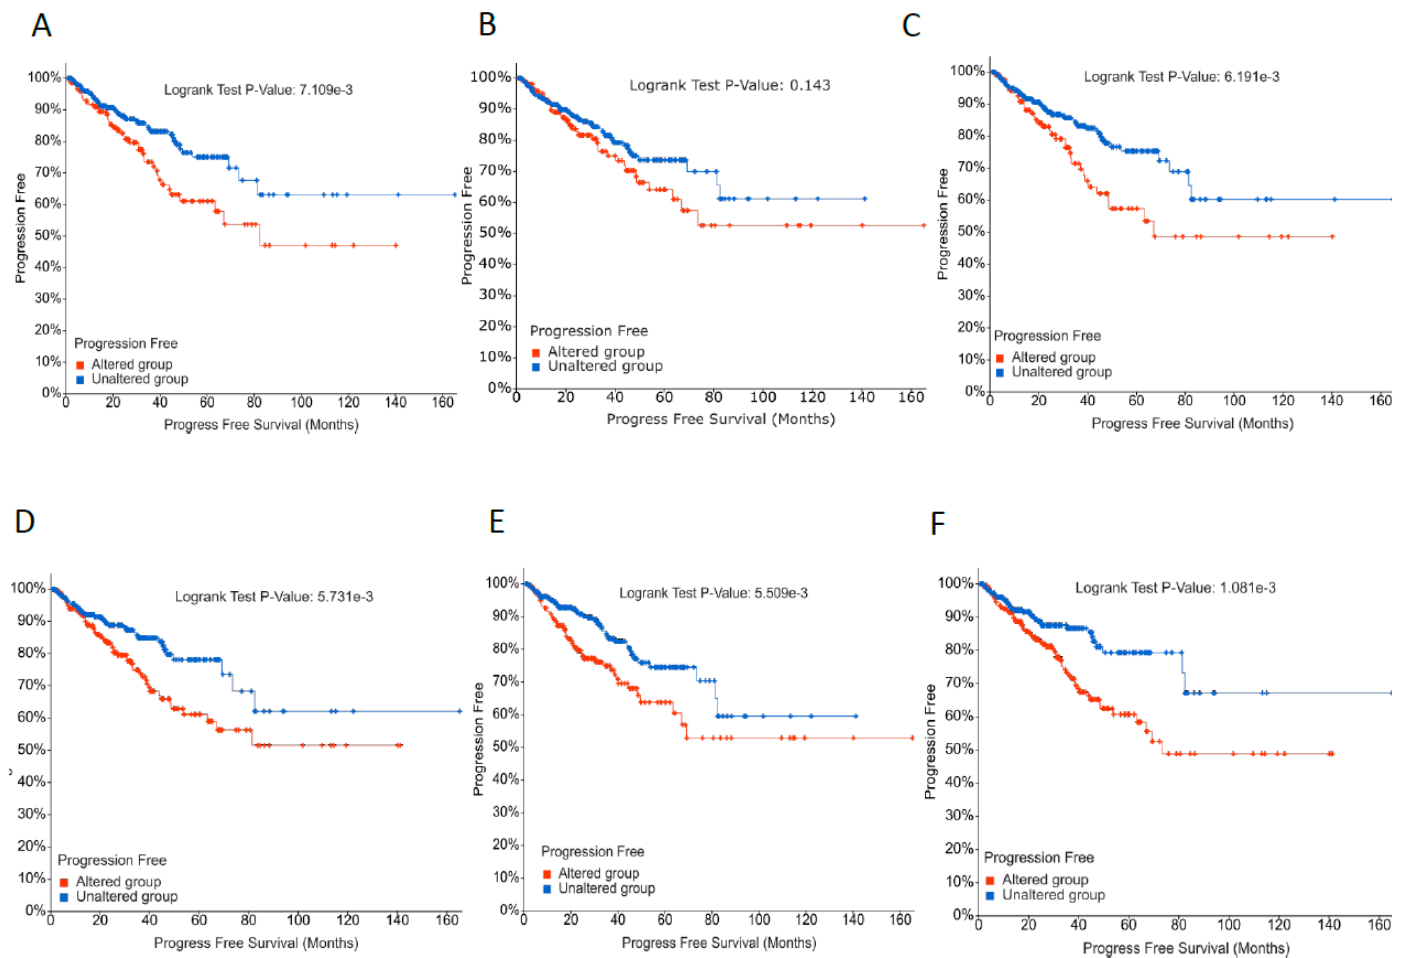

**Figure S2.** Correlation between high expression of functional groups of genes related to the PC-3 HMGB1 interactome and progression free survival in prostate adenocarcinoma patients. (A) LSU rRNA processing; (B) SSU rRNA processing; (C) 5.8 rRNA processing; (D) Ribonucleoprotein complex assembly; (E) spliceosome catalytic step 2; (F) nucleo-cytoplasmic transport.

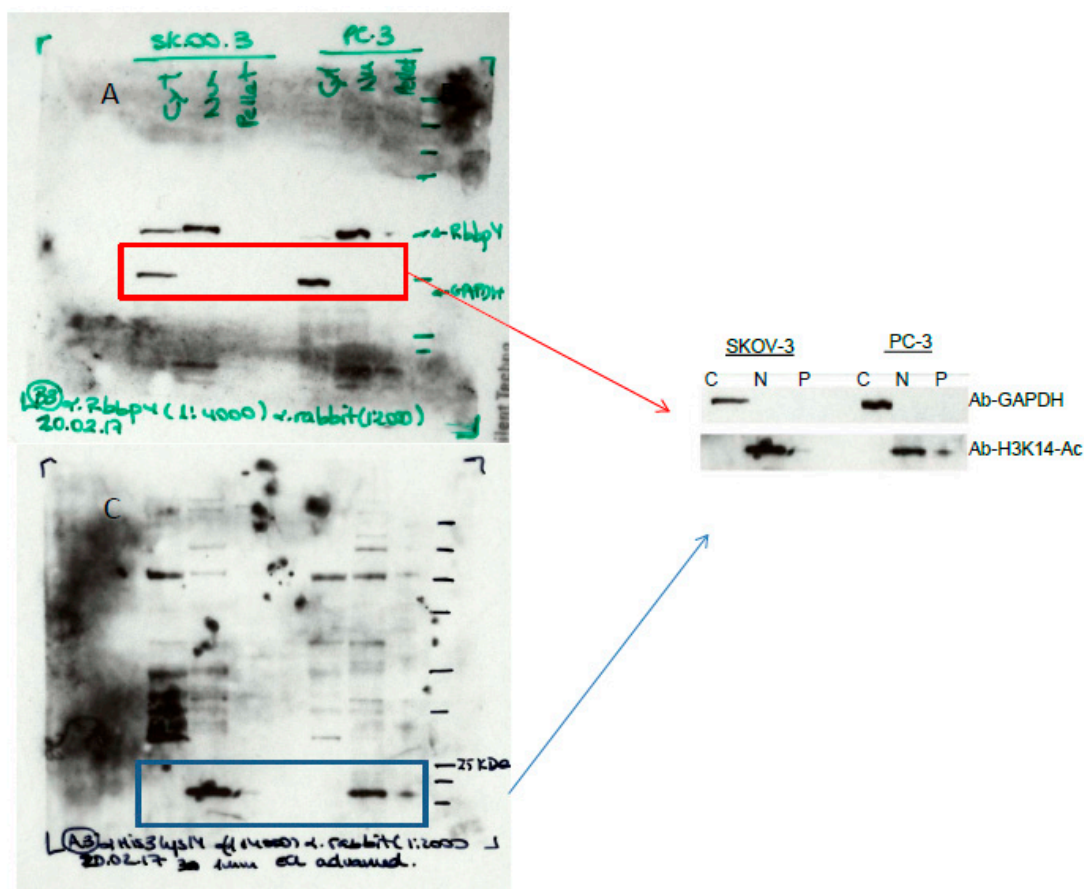

Original Blots Fig. 1A

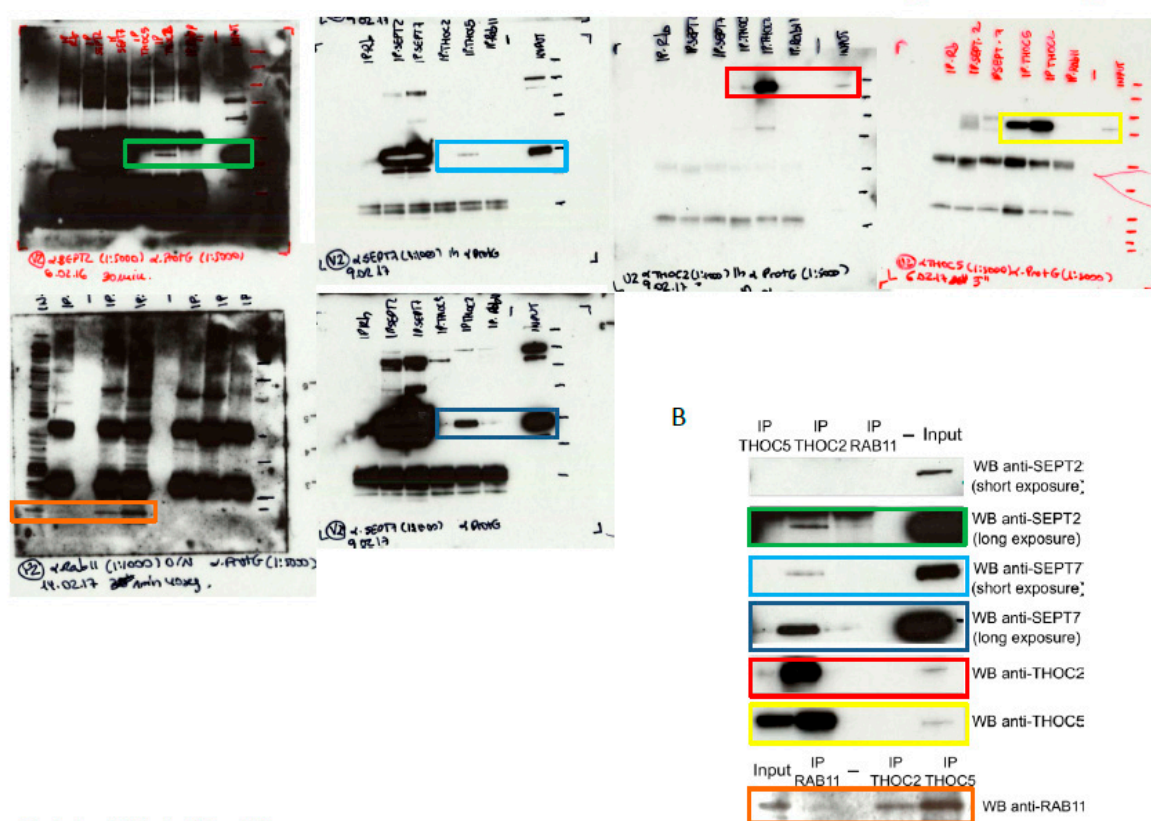

Original Blots Fig. 4A

**Figure S3.** Original Western Blot.
