# Supplementary material for: HMGB1 Protein Interactions in Prostate and Ovary Cancer Models Reveal Links to RNA Processing and Ribosome Biogenesis through NuRD, THOC and Septin Complexes
Source: Cancers (Basel). 2021 Sep 18;13(18):4686. doi: 10.3390/cancers13184686 (PMC8466577; doi:10.3390/cancers13184686)
Supplement: Supplementary file 1 [file cancers-13-04686-s001.zip › cancers-1365269 Tables S1 to S7 revised by authors.xlsx]

## Sheet: Table S1
Table S1. HMGB1 interactome of SKOV-3 cells
		First Experiment (AB08)								Second Experiment (AB10)								Third Experiment (AB11)
		HMGB1 immunoprecipitation				Rabbit immunoprecipitation				HMGB1 immunoprecipitation				Rabbit immunoprecipitation				HMGB1 immunoprecipitation				Rabbit immunoprecipitation
PROTID	GENE	Score	Coverage	Peptides	Spectra	Score	Coverage	Peptides	Spectra	Score	Coverage	Peptides	Spectra	Score	Coverage	Peptides	Spectra	Score	Coverage	Peptides	Spectra	Score	Coverage	Peptides	Spectra	SP
Q14247	CTTN	968.68	31.82	13	51					1905.78	40	18	66					2218.91	42.55	17	91					1
Q14141	SEPTIN6	1100	36.64	11	49					400.44	31.11	11	28					706.42	18.89	8	41					1
Q9BY77	POLDIP3	333.18	22.33	5	15					335.84	34.2	8	16					296.13	22.57	6	15	29.72	3.09	1	1	1
Q13769	THOC5	193.04	15.81	7	19					110.79	15.23	4	11					157.13	5.71	2	16					1
Q6NZY4	ZCCHC8	222.3	6.51	3	8					303.88	15.13	5	14					126.99	8.06	3	6					1
O75643	SNRNP200	2097.1	24.86	38	105					712.88	15.68	16	38					485.05	6.84	8	21					1
Q8N3C0	ASCC3	131.92	4.59	6	11					375.8	8.81	10	21					127.24	2.45	4	7					1
Q13263	TRIM28	518.42	16.05	7	20	76.51	5.39	2	2	756.83	21.68	9	22					410.9	15.45	6	17	37.27	3.71	1	1	1
Q13085	ACACA	53.77	1.45	2	3					154.2	4.09	5	9					308.1	4.82	7	14					1
Q96HH9	GRAMD3	1257.28	33.1	9	57					1934.28	52.08	18	83					2080.39	46.99	15	79					1
Q7Z6E9	RBBP6	166.42	6.53	7	20					232.81	8.48	9	20					259.16	6.92	7	14					1
P62841	RPS15	1668.15	55.86	5	65	464.33	36.55	3	22	2256.28	58.62	6	97	339.79	36.55	3	14	1969.74	39.31	4	71	582.85	23.45	2	27	1
P38919	EIF4A3	1050.19	42.82	15	61	254.98	16.55	5	14	768.72	38.93	15	41					881.95	29.93	10	81					1
Q13428	TCOF1	712.13	12.97	15	40					218.83	8.27	7	14					137.14	3.29	3	10					1
P62314	SNRPD1	316.76	27.73	2	13	26.35	16.81	1	1	208.13	27.73	2	10					135.18	16.81	1	6					1
P43243	MATR3	572.98	14.76	8	32	29.43	1.77	1	2	660.84	25.15	11	46	43.67	2.95	1	2	871.91	26.33	11	63	47.26	5.43	2	5	1
Q8NI27	THOC2	602.29	7.28	9	22					161.26	2.64	3	4					104.25	2.45	3	9					1
Q13523	PRPF4B	370.01	5.66	4	10					464.23	9.63	7	21					103.05	5.46	3	3					1
Q16181	SEPTIN7	1710.18	41.88	14	81					3004.54	49.43	23	165					3312.63	45.31	21	245					1
Q96MU7	YTHDC1	184.4	13.34	6	18					164.83	5.36	3	12					61.4	6.19	4	5					1
O43290	SART1	436.88	18	9	17					642.64	25.5	15	32	50.33	1.13	1	2	760.74	19.63	12	37	68.73	1.13	1	2	1
Q00341	HDLBP	217.08	5.91	5	11					135.87	4.65	3	5					227.51	5.36	4	7					1
Q96KM6	ZNF512B	271.04	16.59	10	22					213.78	11.21	7	13					132.38	3.59	2	7					1
Q9BXP5	SRRT	153.19	7.08	4	10					411.55	13.81	6	21					187.55	16.78	6	12					1
Q8N7H5	PAF1	85.91	6.97	3	5	32.57	2.45	1	1	290.09	13.75	5	12					237.83	11.86	4	11					1
O75494	SRSF10	329.72	23.28	5	22					241.54	23.66	6	17					152.42	10.69	2	9					1
Q9NYF8	BCLAF1	775.88	19.13	16	67	124.49	5.43	5	11	899.6	24.67	19	75					526.74	15	11	50					1
Q5SSJ5	HP1BP3	319.85	10.31	5	24	37.86	6.33	2	4	727.24	17.36	8	35					405.44	17.54	6	17	203.11	6.87	3	5	1
P46783	RPS10	874.47	23.64	4	32	268.27	14.55	3	9	996	46.67	10	51	150.76	15.15	2	7	652.41	29.7	4	35	281.45	20	3	11	1
P09429	HMGB1	659.39	22.33	6	39					1317.28	27.44	11	75					2379.09	33.49	14	189					1
P62851	RPS25	513.34	24	4	23	208.21	24	3	8	392.07	29.6	5	20	93.71	20	3	4	300.63	31.2	5	20	120.49	16	2	5	1
P61326	MAGOH	249.69	36.99	4	8					153.43	43.15	5	8					115.64	21.23	3	6					1
Q9NVA2	SEPTIN11	1274.4	39.39	14	58					1130.8	31.7	16	53					1036.13	19.81	10	58					1
Q9P0V9	SEPTIN10	344.67	33.48	9	35					739.11	37.22	13	41					827.07	27.97	10	40					1
Q09666	AHNAK	2250.72	33.96	78	192					1414.02	24.89	51	129					1971.09	29.39	62	231					1
P38159	RBMX	1401.36	19.95	6	60	285.05	19.95	6	16	1793.54	41.18	16	71	127.35	11	3	6	1075.43	30.69	11	56	355.45	22.51	6	18	1
Q68DK7	MSL1	88.99	10.42	3	4					22.7	4.4	1	3					105.96	6.35	2	9					1
Q14764	MVP	102.39	14.89	6	10					114.15	16.13	6	12					311.49	12.43	4	17	22.61	3.25	1	2	1
Q9H307	PNN	697.91	12.13	7	35	112.06	4.18	2	7	494.98	16.46	9	30					697.23	16.32	11	45					1
Q99719	SEPTIN5	38.4	5.15	1	3					33.35	5.96	1	3					38.46	5.96	1	4					1
Q9Y2W1	THRAP3	1718.24	19.06	15	102	263.02	5.55	4	13	1683.54	23.35	20	95	55.87	1.99	1	2	1529.79	17.8	14	82	159.32	6.81	4	10	1
Q6P1J9	CDC73	143.84	14.69	6	11					161.58	7.53	3	7					143.41	11.86	5	10					1
Q1KMD3	HNRNPUL2	84.71	1.87	1	3					231.66	10.44	4	10					154.87	1.87	1	3					1
P51991	HNRNPA3	387.53	20.9	5	17					100.35	15.34	3	6					156.26	10.05	2	3					1
Q96FV9	THOC1	263.6	14.61	6	20					283.12	14.92	6	19					360.83	18.72	8	21					1
Q92599	SEPTIN8	536.28	36.02	11	38					779.42	38.1	15	55					525.68	25.05	10	51					1
P62081	RPS7	82.01	38.66	4	10					275.46	43.3	6	24	71.27	5.67	1	2	607.74	26.29	6	49	40.48	11.86	1	1	1
Q9UHD8	SEPTIN9	1885.06	36.18	16	109					2770.11	62.63	37	187					6594.09	68.94	50	504					1
P42285	SKIV2L2	69.46	8.35	5	11					260.46	10.84	8	14					115.97	8.83	5	7					1
Q6PKG0	LARP1	98.69	2.37	2	3					293.66	14.05	6	16					243.08	13.23	6	15					1
Q15019	SEPTIN2	1839.09	51.52	12	83					3545.93	71.19	26	177					4540.25	63.16	23	315					1
Q9H1I8	ASCC2	51.37	4.76	2	3					172.18	8.32	4	14					69.17	3.83	1	5					1
Q96CP6	GRAMD1A	198.24	12.43	5	11					540.01	24.31	10	27					789.37	20.3	10	39					1
Q96A72	MAGOHB	207.56	37.16	4	7					113.21	37.16	4	7					47.17	15.54	2	4					1
Q9Y580	RBM7	84.7	6.77	1	3					231.18	13.91	2	7					236.49	22.93	4	7					1
Q15287	RNPS1	380.52	20.33	4	18	88.43	4.92	1	3	709.34	25.57	6	38					348.22	16.72	5	21	78.16	7.54	2	3	1
Q13595	TRA2A	135.55	20.57	3	8					77.29	4.96	1	3					105.39	8.16	2	4					1
O75934	BCAS2	226.1	41.78	6	17					57.86	23.56	2	4					66.99	12.44	1	4					1
Q7Z3K3	POGZ	177.18	5.82	5	10	41.41	1.06	1	1	186.73	9.5	7	15					74.37	2.48	2	4					1
Q86V48	LUZP1	211.85	10.59	8	13					579.76	24.81	18	31					643.37	15.61	10	26					1
Q9UJF2	RASAL2	414.88	12.82	10	30					343.38	15.36	9	21					477.07	10.8	7	53					1
Q96ST2	IWS1	121.19	5.25	3	7					130.09	6.72	3	8					125.58	4.03	2	4					1
P09874	PARP1	1860.88	34.32	27	91	364.8	14.69	11	19	1096.07	27.22	18	58	242.4	5.72	4	6	1129.87	20.32	16	62	442.99	12.62	9	19	1
Q8IVT2	MISP	70.71	9.57	4	9					137.77	21.21	7	13					213.7	13.4	5	9					1
Q86W42	THOC6	82.93	8.8	2	6					155.14	10.26	2	8					128.84	14.37	3	7					1
Q8IX01	SUGP2	307.06	8.69	7	15					253.19	17.65	7	15					96.91	5.36	3	7					1
Q6P2Q9	PRPF8	2504.05	24.67	37	120	27.74	1.28	2	2	901.39	15.2	17	52					251.2	6.08	7	11					1
P05386	RPLP1	141.66	74.56	3	8	44.64	14.04	1	3	335.7	94.74	4	18					161.85	66.67	3	12	37.43	14.91	1	1	0.99
Q9Y520	PRRC2C	70.23	0.97	2	2					78.95	6.35	6	9					208.09	5.8	8	20					0.99
Q5BKZ1	ZNF326	128.54	2.75	1	3					138.11	2.75	1	3					99.37	2.75	1	2					0.99
Q9HCI7	MSL2	64.78	5.2	2	4					58.28	9.01	3	4					28.68	2.95	1	2					0.99
Q14498	RBM39	80.33	4.91	2	4					302.1	11.89	4	9					40.2	2.83	1	2					0.99
Q9UKM9	RALY	55.09	9.8	2	5					308.86	21.57	4	11					59.81	3.92	1	2					0.99
Q13573	SNW1	606.31	27.99	9	27	24.92	4.66	1	1	67.11	4.66	1	3					105.31	7.28	2	4					0.99
Q09028	RBBP4	209.47	11.29	3	8					100.87	3.29	1	2					124.24	3.29	1	4					0.99
Q96S94	CCNL2	45.98	11.54	2	3					51.6	4.04	1	2					100.18	4.04	1	2					0.99
Q15029	EFTUD2	1007.62	29.63	18	49	60.66	1.34	1	2	229.44	19.24	10	19					85.57	3.91	2	5					0.99
Q9Y5B9	SUPT16H	527.95	15.19	12	31	133.39	6.59	6	10	489.07	14.33	10	25					453.55	15.28	11	33	116.43	7.26	4	7	0.99
P62273	RPS29	225.19	33.93	2	10	57.6	33.93	2	3	257.1	33.93	2	13	50.34	14.29	1	2	341.78	33.93	2	20	87.84	33.93	2	4	0.99
Q8NAV1	PRPF38A	262.43	15.71	3	11					109.68	6.73	1	4					65.56	3.85	1	2					0.99
Q16576	RBBP7	147.86	4.94	2	4					58.84	3.06	1	2					93.59	3.06	1	2					0.99
Q86VM9	ZC3H18	161.75	5.88	3	10	48.4	4.51	2	4	201.68	8.29	6	15					247.66	13.12	9	19					0.99
Q9UQ35	SRRM2	1711.26	15.92	28	88	242.05	4.98	9	18	997.5	11.88	21	47					540.55	8.25	16	34					0.99
P52272	HNRNPM	422.8	16.3	7	16	144.36	2.19	1	2	501.07	25.07	9	30					370.44	12.47	5	14	94.98	8.36	3	6	0.98
P32969	RPL9	388.74	34.38	5	22	124.67	15.63	2	6	433.26	45.83	8	28					961.58	22.4	3	63	123.94	35.42	5	10	0.98
Q8NC51	SERBP1	129.58	13.73	5	9					98.04	12.5	3	5					117.16	9.07	3	8	40.12	5.15	1	2	0.98
Q9UKV3	ACIN1	1006.72	16.93	17	54	300.74	9.77	9	19	932.96	19.16	19	54					384.88	12.83	13	26					0.97
P08865	RPSA	339.44	26.78	5	13	147.48	10.51	3	6	508.21	41.36	7	21					352.53	28.14	5	13	95.01	5.42	1	2	0.97
Q16629	SRSF7	294.25	23.53	6	23	178.86	18.49	4	6	144.35	19.75	3	13					56.28	15.97	2	10					0.97
Q13242	SRSF9	77.95	27.15	6	11	42	9.5	2	2	121.66	33.48	6	16					31.86	10.86	2	4					0.97
P55209	NAP1L1	231.47	7.42	2	10					183.29	4.6	1	6					197.08	13.81	3	11	27.4	4.6	1	3	0.97
Q9Y5S9	RBM8A	342.28	25.86	3	15	111.76	19.54	2	5	311.76	55.17	6	26					145.65	10.92	1	7					0.96
P11021	HSPA5	380.51	12.54	6	13	101.09	2.45	1	3	135.69	6.57	3	5					131.11	10.4	5	7					0.95
P84103	SRSF3	231.44	23.17	3	14	52.1	8.54	1	2	388.55	28.66	3	24					33.28	12.8	1	3					0.95
P62979	RPS27A	135.85	16.03	2	10	33.16	10.26	1	2	277.19	7.69	1	10					103.17	17.95	2	10	47.95	23.72	3	5	0.94
Q96QD9	FYTTD1	329.33	27.67	8	17	98.51	6.6	2	4	85.3	19.81	5	6					104.14	10.69	3	7					0.94
Q13247	SRSF6	128.58	12.5	4	7	41.8	2.62	1	2	122.01	9.01	3	6					52.34	2.62	1	3					0.94
Q92522	H1FX	211.01	18.78	3	7					151.75	14.08	2	5					223.04	18.78	3	10	79.73	13.15	2	4	0.92
P14866	HNRNPL	243.92	7.64	2	12					123.08	4.92	1	5					121.6	4.92	1	6	39.13	4.92	1	4	0.91
Q08170	SRSF4	136.4	4.25	2	6	41.8	1.82	1	2	70.28	1.82	1	3					52.34	1.82	1	3					0.89
Q13243	SRSF5	84.23	12.5	3	5	41.8	3.31	1	2	70.28	3.31	1	3					52.34	3.31	1	3					0.88
P62995	TRA2B	844.42	19.79	5	50	106.87	12.85	3	5	433.23	22.57	8	32					43.96	12.5	3	4					0.86
P62244	RPS15A	69.38	23.85	3	7	36.22	6.15	1	1	506.46	59.23	8	40	30.44	6.15	1	1	311.49	43.85	7	41	99.8	21.54	3	6	0.84
O76021	RSL1D1	91.9	2.45	1	2					583.25	26.94	11	33					288.9	22.04	7	13	50.83	9.18	3	3	0.83
Q15424	SAFB	580.03	13.11	8	23	95.24	7.32	3	8	95.4	6.78	3	7					206.17	10.27	4	11					0.83
P31943	HNRNPH1	287.1	14.25	4	11					153.27	11.14	3	5					80.45	3.79	1	3	79.85	3.79	1	4	0.79
P0CW22	RPS17L	531.96	40.74	4	28	182.88	32.59	2	6	881.89	56.3	8	41	185.23	23.7	2	8	1518.55	63.7	10	80	416.42	46.67	5	16	0.75
Q13501	SQSTM1	415.51	13.18	3	11	93.6	4.77	1	3	167.54	14.32	3	9					79.32	5.91	1	3	66.68	5.91	1	2	0.73
Q08945	SSRP1	545.66	16.08	9	26	71.29	4.09	3	6	163.08	5.08	2	6					173.74	7.62	4	16	39.23	5.36	2	3	0.71

## Sheet: Table S2
Table S2. HMGB1 interactome of PC-3 cells
		First Experiment (AB09)								Second Experiment (AB07)								Third Experiment (AB06)
		HMGB1 immunoprecipitation				Rabbit immunoprecipitation				HMGB1 immunoprecipitation				Rabbit immunoprecipitation				HMGB1 immunoprecipitation				Rabbit immunoprecipitation
PROTID	GENE	Score	Coverage	Peptides	Spectra	Score	Coverage	Peptides	Spectra	Score	Coverage	Peptides	Spectra	Score	Coverage	Peptides	Spectra	Score	Coverage	Peptides	Spectra	Score	Coverage	Peptides	Spectra	SP
Q14247	CTTN	1874.35	40.91	19	79				0	1406.59	32.36	14	54				0	1485.9	52.36	18	64				0	1
Q14141	SEPTIN6	587.09	33.41	11	33				0	1017.93	30.41	11	42				0	612.28	26.5	8	32				0	1
Q9UHD8	SEPTIN9	4349.55	57.51	37	272				0	2080.07	35.67	18	112				0	4810.73	82.94	51	307				0	1
Q13769	THOC5	112.23	14.06	4	13				0	312.56	12.45	5	20				0	179.96	17.13	5	21				0	1
Q6NZY4	ZCCHC8	253.1	8.06	3	11				0	325.11	9.62	4	12				0	72.03	5.66	3	5				0	1
O75643	SNRNP200	419.3	7.07	7	25				0	654.44	12.22	14	34	60.04	0.7	1	1	327.13	2.34	3	7				0	1
Q13085	ACACA	345.29	6.35	9	18				0	51.79	2	3	5				0	309.03	7.76	9	18				0	1
Q96HH9	GRAMD3	564.69	22.22	9	26				0	412.63	25.69	6	16				0	302.62	21.3	6	18				0	1
Q7Z6E9	RBBP6	46.06	2.9	4	8				0	103.28	4.85	5	9				0	188	3.24	3	4				0	1
Q13428	TCOF1	161.93	3.9	4	9				0	369.89	5.65	6	13				0	196.82	8.74	8	14				0	1
P62491	RAB11A	156.49	25.46	4	15				0	94.23	27.31	3	7				0	660.35	40.74	6	25				0	1
P43243	MATR3	305.22	19.72	9	23	77.04	2.95	1	3	230.04	10.27	5	16				0	230.49	17.12	6	13				0	1
Q8NI27	THOC2	457.71	4.46	6	15				0	529.93	5.27	6	20				0	228.28	6.84	5	14				0	1
Q16181	SEPTIN7	4559.52	41.42	23	214				0	1404.81	45.54	13	66				0	2158.33	51.72	22	123				0	1
Q96KM6	ZNF512B	306.29	14.13	8	18				0	182.13	16.59	9	17				0	146.97	11.43	7	12				0	1
Q9BXF6	RAB11FIP5	477.83	17.15	5	19				0	468.39	19.14	6	19				0	844.58	37.98	13	33				0	1
Q96Q06	PLIN4	1261.37	25.72	19	64				0	1030.91	21.81	15	47				0	944.97	25.42	15	42				0	1
Q3KR37	GRAMD1B	1016.01	26.96	12	44				0	741.46	19.78	12	45				0	273.2	13.28	5	15				0	1
P09429	HMGB1	1230.89	27.44	10	71				0	815.93	22.33	6	40				0	964.41	43.72	10	63				0	1
Q15029	EFTUD2	56.71	11.93	5	9				0	574.71	12.86	9	25				0	67.76	10.49	3	6				0	1
Q96RR1	C10orf2	1735.54	27.19	14	65				0	1213.89	29.97	12	49				0	1567.34	42.4	19	75				0	1
Q9NVA2	SEPTIN11	959.49	28.9	15	44				0	1100.33	29.84	10	40				0	701.46	31	14	37				0	1
Q9P0V9	SEPTIN10	1854.29	39.43	18	87				0	527.11	24.89	7	36				0	1194.75	52.64	21	65				0	1
Q09666	AHNAK	273.84	8.73	11	27				0	103.74	6.69	5	10				0	102.81	12.51	15	28				0	1
Q68DK7	MSL1	36.33	7.82	2	4				0	52.1	2.77	1	3				0	64.83	6.84	2	4				0	1
Q99719	SEPTIN5	115	13.01	3	6				0	31.71	8.94	2	3				0	55.53	5.96	1	3				0	1
Q53EZ4	CEP55	132.17	12.93	4	8				0	281.93	10.99	4	10				0	97.61	11.21	2	5				0	1
Q96FV9	THOC1	444.98	26.94	12	34				0	198.43	14.76	7	15				0	360.82	27.25	9	26				0	1
Q92599	SEPTIN8	348.25	27.12	9	25				0	151.61	10.97	4	6				0	216.33	20.91	7	17				0	1
Q96DI7	SNRNP40	59.63	22.97	4	5				0	40.02	11.2	2	4				0	117.45	10.92	1	5				0	1
Q15019	SEPTIN2	5499.69	66.76	25	247				0	1277.07	41.27	10	68				0	3046.61	69.25	22	151				0	1
Q96CP6	GRAMD1A	294.61	8.84	4	12				0	176.7	14.92	6	10				0	154.87	6.22	3	7				0	1
O95926	SYF2	95.86	11.93	1	5				0	46.11	11.52	1	3				0	105.64	11.93	1	4				0	1
Q86W42	THOC6	147.59	14.66	3	9				0	158.55	13.49	3	7				0	92.88	11.14	2	5				0	1
P49761	CLK3	106.66	3.13	1	3				0	73.28	4.23	2	4				0	43.88	3.13	1	3				0	1
Q13523	PRPF4B	474.18	8.54	6	20	78.2	2.18	1	1	362.82	6.95	5	11	124.79	2.18	1	3	315.47	3.77	2	9				0	0.99
Q6P2Q9	PRPF8	375.26	10.02	11	28	45.49	2.06	2	2	594.64	8.99	11	32	34.88	1.88	2	4	307.08	2.78	3	12				0	0.99
Q07021	C1QBP	75.14	10.64	1	5				0	21.08	19.86	2	3				0	49.49	10.64	1	2				0	0.98
P48634	PRRC2A	29.31	2.5	2	3				0	20.41	2.41	3	4				0	73.47	1.44	1	2				0	0.98
Q9UQ35	SRRM2	652.9	7.99	14	29	161.87	3.05	6	11	517.91	8.1	14	32	92.83	3.56	7	10	520.31	8.98	14	29	123.72	3.2	5	9	0.98
O43290	SART1	455.83	17	10	18	50.62	1.13	1	2	258.93	10.25	5	8	70.38	1.13	1	3	230.19	10.63	5	9	21.32	1.13	1	1	0.97
Q16576	RBBP7	107.59	3.06	1	2				0	149.73	12.24	3	5				0	91.61	3.06	1	2				0	0.97
Q9BXP5	SRRT	429.61	20.09	8	22	170.17	9.59	3	6	409.17	13.93	8	32	191.1	6.39	3	10	555.69	19.52	9	23	150.07	10.16	4	7	0.96
O75533	SF3B1	150.84	11.89	7	13				0	147.52	7.98	5	10	30.09	3.07	2	2	34.17	3.91	2	4				0	0.94
Q09161	NCBP1	73.29	4.68	3	5				0	118.94	4.05	2	6	29	2.66	1	2	153.74	2.66	1	4				0	0.89
Q9Y3Y2	CHTOP	177.61	11.69	2	9	105.57	11.69	2	5	162.7	12.1	3	12				0	195.96	16.94	3	7				0	0.85
P42285	SKIV2L2	43	6.33	4	4				0	160.33	8.54	5	14	29.39	1.92	1	3	143.04	5.47	3	6				0	0.84
Q9NYF8	BCLAF1	614.79	17.07	14	51	45.06	7.61	4	7	444.73	15.33	11	36	222.07	6.63	5	14	359.38	15.11	11	26	53.54	4.78	3	5	0.81
Q96MU7	YTHDC1	85.16	9.63	4	7	55.28	3.3	2	2	100.91	3.44	2	6				0	76.29	3.99	2	2				0	0.79
Q09028	RBBP4	121.26	3.29	1	3	77.69	3.29	1	2	154.12	12.71	3	4				0	116.95	3.29	1	3				0	0.71

## Sheet: Table S3
Table S3. HMGB1 interactome in the nuclear fraction of SKOV-3 cells
		HMGB1 immunoprecipitation				Rabbit immunoprecipitation
PROTID	GENE	Score	Coverage	Peptides	Spectra	Score	Coverage	Peptides	Spectra	SP
Q9Y3U8	RPL36	1005.98	23.81	5	62				0	1
Q9NQ86	TRIM36	31.37	0.82	1	2				0	1
P62753	RPS6	632.94	18.88	6	29	128.8	15.26	3	6	1
P62750	RPL23A	355.94	16.67	4	17				0	1
Q8IUE6	HIST2H2AB	6262.63	66.15	8	309	214.67	29.23	2	10	1
Q14247	CTTN	1467.51	30.36	13	48				0	1
Q8N5F7	NKAP	131.54	10.84	2	8				0	1
P24928	POLR2A	168.75	1.73	2	3				0	1
Q9Y2R9	MRPS7	77.23	9.5	2	4				0	1
P07910	HNRNPC	2564.56	41.18	12	97				0	1
Q2TB10	ZNF800	40.19	3.46	1	3				0	1
P0C0S5	H2AFZ	6241.23	56.25	7	423	180.37	35.16	3	9	1
Q9NQS7	INCENP	89.2	6.21	4	7				0	1
P02545	LMNA	26.36	2.11	1	2				0	1
P40429	RPL13A	1186	38.42	10	92				0	1
Q9Y676	MRPS18B	40.22	12.79	1	3				0	1
Q14141	SEPTIN6	56.2	3.92	2	3				0	1
Q6DRA6	HIST2H2BD	1284.83	19.51	4	83				0	1
P05386	RPLP1	95.96	51.75	2	5				0	1
P05387	RPLP2	650.96	80	10	38				0	1
P05388	RPLP0	1523.6	31.23	9	62				0	1
P78345	RPP38	25.6	3.89	1	2				0	1
P62877	RBX1	112.92	17.59	1	3				0	1
O00566	MPHOSPH10	42.33	4.7	1	2				0	1
O00567	NOP56	475.82	15.99	5	11				0	1
O60508	CDC40	133.51	13.64	4	9				0	1
O76021	RSL1D1	1035.66	27.96	13	49				0	1
P52272	HNRNPM	3363.1	47.53	21	171				0	1
P67809	YBX1	299.06	25	3	15				0	1
Q99549	MPHOSPH8	42.64	6.05	2	10				0	1
Q15365	PCBP1	485.69	25	4	26				0	1
Q9UMS4	PRPF19	723.75	43.45	13	48				0	1
P39023	RPL3	2452.72	39.7	12	152				0	1
Q13242	SRSF9	51.47	15.84	3	7				0	1
O75533	SF3B1	99.75	8.21	5	9				0	1
O75531	BANF1	269.23	29.21	2	15				0	1
P08621	SNRNP70	90.33	5.95	2	4				0	1
P62805	HIST1H4A	30689.47	65.05	16	1379	441.5	41.75	5	21	1
O94776	MTA2	51.46	5.84	3	3				0	1
Q9HCE1	MOV10	410.04	8.08	5	10				0	1
P27635	RPL10	375.38	6.54	2	12				0	1
Q99880	HIST1H2BL	16261.6	64.29	12	590	518.33	19.84	2	12	1
Q5BKZ1	ZNF326	374.23	13.92	5	18				0	1
P11142	HSPA8	694.12	22.14	11	31				0	1
Q71DI3	HIST2H3A	3726.67	60.29	13	271	32.83	6.62	1	1	1
Q9UKX5	ITGA11	40.89	0.84	1	3				0	1
Q13601	KRR1	74.81	10.5	2	4				0	1
Q8TBK6	ZCCHC10	82.56	7.29	1	2				0	1
P62899	RPL31	193.24	25.6	3	9				0	1
P18077	RPL35A	120.65	23.64	3	15				0	1
Q9BUJ2	HNRNPUL1	93.54	5.49	3	7				0	1
P62266	RPS23	450.82	16.08	3	17	118.05	15.38	2	3	1
P62263	RPS14	319.91	26.49	6	23				0	1
P62269	RPS18	632.59	41.45	8	39				0	1
Q6NZY4	ZCCHC8	75.56	3.11	1	4				0	1
P98160	HSPG2	1032.67	5.42	16	48				0	1
O75643	SNRNP200	1434.34	19.94	22	85				0	1
Q92522	H1FX	83.71	13.62	3	5				0	1
P06748	NPM1	5288.33	63.95	13	356				0	1
Q9Y5S9	RBM8A	610.01	38.51	5	26				0	1
Q08945	SSRP1	334.9	10.3	5	18				0	1
Q9Y3Y2	CHTOP	153.38	11.69	2	8	104.99	5.24	1	2	1
Q02878	RPL6	4538.15	48.61	17	216				0	1
Q96QD9	FYTTD1	100.9	16.67	4	5				0	1
Q07955	SRSF1	35.87	13.31	2	3				0	1
Q9Y2Q9	MRPS28	38.99	5.35	1	2				0	1
O75367	H2AFY	1673.75	35.22	7	82				0	1
Q9H7B2	RPF2	677.95	38.56	10	45				0	1
P60709	ACTB	264.93	24.8	6	20	98.8	12	3	4	1
Q96HH9	GRAMD3	662.71	27.78	7	25				0	1
Q7Z6E9	RBBP6	231.87	6.7	6	10				0	1
Q96EY7	PTCD3	78.05	1.74	1	2				0	1
P62841	RPS15	950.88	28.28	2	32				0	1
P61353	RPL27	734.97	54.41	9	58				0	1
P62847	RPS24	475.36	30.08	5	26				0	1
P38919	EIF4A3	1981.31	40.63	18	111				0	1
Q6FI13	HIST2H2AA3	17985.8	71.54	13	1167	427.08	63.08	6	22	1
P62318	SNRPD3	97.46	15.08	2	4				0	1
Q13428	TCOF1	265.7	6.32	6	15				0	1
P62316	SNRPD2	122.14	15.25	1	2				0	1
P62314	SNRPD1	186.8	27.73	2	8				0	1
Q9BQG0	MYBBP1A	67.85	1.28	1	3				0	1
Q9HCI7	MSL2	50.15	2.95	1	2				0	1
Q14966	ZNF638	36	1.92	1	2				0	1
Q66PJ3	ARL6IP4	220.4	8.55	3	16				0	1
P0CW22	RPS17L	331.28	42.96	4	18				0	1
Q9UKV3	ACIN1	325.18	8.13	8	17				0	1
Q9Y4K0	LOXL2	133.88	3.23	2	5				0	1
Q9Y3D9	MRPS23	50.06	5.26	1	2				0	1
P62995	TRA2B	898.31	13.89	4	33				0	1
Q16181	SEPTIN7	257.23	9.84	3	10				0	1
Q8N257	HIST3H2BB	16219.85	60.32	9	592	411.05	11.9	1	8	1
Q96MU7	YTHDC1	36.93	3.3	2	2				0	1
Q92804	TAF15	286.45	14.02	5	20				0	1
Q02539	HIST1H1A	1353.11	31.63	7	63	482.33	7.44	4	20	1
Q9BYN8	MRPS26	80.81	8.78	1	3				0	1
P84098	RPL19	873.65	26.02	6	36				0	1
P23497	SP100	86.61	4.32	2	6				0	1
Q15269	PWP2	124.68	1.74	1	2				0	1
O75607	NPM3	100	8.99	1	2				0	1
Q8TDN6	BRIX1	1423.93	44.76	12	102				0	1
P55060	CSE1L	622.74	0.82	1	73				0	1
Q9NW64	RBM22	72.56	7.14	2	3				0	1
P05141	SLC25A5	155.68	14.43	3	5	22.44	3.02	1	1	1
Q53HL2	CDCA8	68.45	15.71	3	3				0	1
Q02543	RPL18A	763.51	24.43	6	41				0	1
Q13823	GNL2	34.13	4.79	2	3				0	1
Q9BRT6	LLPH	208.33	23.26	2	8				0	1
P07996	THBS1	111.17	4.27	3	4				0	1
P61313	RPL15	2260.29	34.31	7	140				0	1
Q9UKD2	MRTO4	88.28	14.23	2	5				0	1
Q9HCM1	KIAA1551	92.48	2.18	3	5				0	1
Q9UKM9	RALY	1619.48	41.18	11	75				0	1
Q13263	TRIM28	1028.76	20.36	9	34				0	1
P15880	RPS2	427.07	29.01	8	31				0	1
Q9ULV3	CIZ1	49.35	8.46	3	4				0	1
Q96KM6	ZNF512B	475.54	18.5	9	27				0	1
P42766	RPL35	416.53	22.76	4	19	61.35	8.13	1	2	1
P22626	HNRNPA2B1	208.48	17	3	7				0	1
Q6PK04	CCDC137	67.02	6.23	1	2				0	1
Q9HCD5	NCOA5	240.98	26.94	8	20				0	1
O15230	LAMA5	83.5	0.43	1	3				0	1
Q9NYP9	MIS18A	74.02	10.73	2	4				0	1
O75494	SRSF10	201.09	19.47	4	15				0	1
P16401	HIST1H1B	1672.35	31.42	10	64	197.82	23.89	5	10	1
P62701	RPS4X	208.81	24.71	5	23				0	1
Q15424	SAFB	244.21	11.15	6	15				0	1
Q15427	SF3B4	87.47	5.42	1	2				0	1
P68431	HIST1H3A	5222.69	60.29	13	345	346.33	30.15	2	13	1
Q13427	PPIG	117.65	4.77	2	6				0	1
P62277	RPS13	512.88	38.41	7	28	28.3	4.64	1	1	1
P46013	MKI67	103.96	2.83	6	7				0	1
P62273	RPS29	209.33	33.93	2	11				0	1
Q9BRJ2	MRPL45	30.8	15.69	2	3				0	1
Q9NPG3	UBN1	30.56	2.65	1	2				0	1
Q09028	RBBP4	134.81	19.53	5	12				0	1
Q9NYF8	BCLAF1	446.65	13.04	8	47				0	1
Q5T3J3	LRIF1	128.45	9.36	4	5				0	1
Q9H6W3	RIOX1	61.41	9.83	3	6				0	1
Q5SSJ5	HP1BP3	309.28	8.86	3	19				0	1
Q14137	BOP1	71.06	3.49	1	2				0	1
P25398	RPS12	435.52	34.09	4	19				0	1
P46783	RPS10	291.17	14.55	2	16				0	1
P46782	RPS5	307.35	18.63	3	14				0	1
P46781	RPS9	259.33	36.6	12	33	23.71	3.61	1	1	1
P26373	RPL13	739	44.55	10	54	298.58	20.38	4	12	1
O60783	MRPS14	123.65	11.72	1	2				0	1
Q9P015	MRPL15	53.52	8.45	1	3				0	1
O95271	TNKS	41.87	0.6	1	2				0	1
Q99459	CDC5L	363.54	22.57	9	22				0	1
Q86TS9	MRPL52	62.07	26.83	1	2				0	1
Q13185	CBX3	447.53	23.5	3	10				0	1
P09429	HMGB1	199.2	16.28	4	13				0	1
P43243	MATR3	1128.56	32.82	15	77				0	1
Q9BVP2	GNL3	219.37	17.85	5	13				0	1
P82673	MRPS35	70.62	8.36	1	3				0	1
P82675	MRPS5	35.06	3.26	1	2				0	1
P62851	RPS25	189.8	24	3	10				0	1
P08107	SPA1A;HSPA1	168.92	4.52	2	5				0	1
P18621	RPL17	223.32	32.07	7	22				0	1
P61326	MAGOH	468.69	49.32	6	22				0	1
P62857	RPS28	176.64	21.74	2	9				0	1
Q93077	HIST1H2AC	14777.24	71.54	11	834	458.98	54.62	5	22	1
Q9ULR0	ISY1	97.06	11.23	2	5				0	1
P52597	HNRNPF	408.79	13.25	4	20				0	1
P20671	HIST1H2AD	18253.95	71.54	13	1182	521.46	63.08	6	26	1
P62910	RPL32	248.44	18.52	4	28				0	1
P62913	RPL11	487.57	15.73	3	27				0	1
P62917	RPL8	430.63	28.02	5	21				0	1
P31943	HNRNPH1	1011.04	23.16	7	41				0	1
P31942	HNRNPH3	103.84	4.91	1	3				0	1
Q15029	EFTUD2	940.98	19.96	12	41				0	1
O00422	SAP18	192.02	32.03	2	10				0	1
P62304	SNRPE	113.55	29.35	2	7				0	1
Q96RR1	C10orf2	239.7	11.4	4	12				0	1
Q86V81	ALYREF	203.77	17.51	2	3				0	1
Q6PL18	ATAD2	1392.79	26.55	24	78				0	1
Q8NEY8	PPHLN1	145.5	12.23	5	7				0	1
P23396	RPS3	930.07	52.26	12	58				0	1
P35268	RPL22	223.76	19.53	3	12				0	1
Q9Y5B9	SUPT16H	565.07	15.09	11	33				0	1
Q9ULI0	ATAD2B	78.01	2.47	2	3				0	1
P34741	SDC2	215.48	7.46	1	6				0	1
Q6P0N0	MIS18BP1	126.95	8.13	4	7				0	1
P51398	DAP3	159.62	17.34	4	7				0	1
Q13573	SNW1	564.41	31.16	10	26				0	1
Q9UN73	PCDHA6	39.6	0.84	2	2				0	1
P61254	RPL26	86.44	22.07	5	11				0	1
Q9NQZ2	UTP3	37.36	6.47	1	2				0	1
Q14980	NUMA1	685.39	11.73	13	33				0	1
Q09666	AHNAK	1590.09	30.05	66	173				0	1
P30414	NKTR	116.45	4.65	4	11				0	1
P38159	RBMX	1936.48	32.99	12	72				0	1
Q9H307	PNN	847.12	13.11	8	47				0	1
Q8WWQ0	PHIP	1260.17	22.24	26	92				0	1
P52815	MRPL12	130.44	35.86	3	10				0	1
Q07020	RPL18	1759.33	36.7	9	66				0	1
O14979	HNRNPDL	37.8	8.33	1	3				0	1
Q9Y2W1	THRAP3	1046.09	18.95	12	74				0	1
O00468	AGRN	422.56	9.92	10	21				0	1
Q9BYD3	MRPL4	49.43	11.25	2	2				0	1
P11387	TOP1	120.31	9.15	5	9				0	1
Q9P0M6	H2AFY2	1170.27	38.71	8	54				0	1
Q14684	RRP1B	323.43	24.27	10	17				0	1
P11388	TOP2A	469.41	9.41	10	21				0	1
P62829	RPL23	269.48	13.57	3	11				0	1
Q1KMD3	HNRNPUL2	244.74	5.62	3	8				0	1
P18583	SON	1265.17	17.19	23	87				0	1
Q6NZI2	PTRF	113.75	4.36	1	2				0	1
Q9BZE4	GTPBP4	396.07	22.56	10	26				0	1
Q92599	SEPTIN8	56.2	3.52	2	3				0	1
P50914	RPL14	1356.6	14.88	3	42				0	1
P49750	YLPM1	70.98	3.49	4	5				0	1
P61513	RPL37A	602.97	19.57	1	13				0	1
O43660	PLRG1	169.42	10.12	2	5				0	1
Q13547	HDAC1	100.77	10.17	4	8				0	1
P62241	RPS8	993.24	28.37	5	48	42.78	5.29	1	2	1
P62244	RPS15A	87.38	10	1	2				0	1
P62249	RPS16	736.95	53.42	11	50				0	1
Q9UHD8	SEPTIN9	490.8	18.43	6	20				0	1
Q8NAV1	PRPF38A	72.61	8.97	2	3				0	1
P18124	RPL7	1866.39	51.21	18	147				0	1
Q03188	CENPC	22.53	3.18	2	2				0	1
P17480	UBTF	79.02	6.02	3	5				0	1
Q96DI7	SNRNP40	59.52	11.48	2	4				0	1
Q9NWH9	SLTM	268.65	4.74	4	8				0	1
P18827	SDC1	211.79	11.94	2	11				0	1
Q9BYG3	NIFK	227.85	26.96	4	7				0	1
P62424	RPL7A	2217.27	37.22	13	105				0	1
P30050	RPL12	914.36	45.45	4	44				0	1
Q9Y2X3	NOP58	335.56	12.67	4	6				0	1
P84243	H3F3A	1575.98	60.29	13	145	32.83	6.62	1	1	1
P62906	RPL10A	1289.96	31.8	9	89				0	1
P83731	RPL24	232.05	19.11	3	10	75.94	10.83	2	3	1
P62861	FAU	105.97	18.64	2	17				0	1
P19338	NCL	2838.86	27.32	21	114				0	1
P16104	H2AFX	9063.64	55.24	9	622	222.3	31.47	3	13	1
P35052	GPC1	70.83	5.73	2	3				0	1
Q15393	SF3B3	80.77	2.14	2	2				0	1
Q15019	SEPTIN2	250.95	19.94	4	14				0	1
Q15397	KIAA0020	21.88	3.86	1	2				0	1
Q96PK6	RBM14	359.92	15.7	8	18				0	1
Q96T58	SPEN	226.97	3.77	6	10				0	1
P45973	CBX5	92.6	6.81	1	4				0	1
Q16576	RBBP7	236.25	14.82	5	7				0	1
P39019	RPS19	444.85	36.55	7	28				0	1
Q86VM9	ZC3H18	36.99	2.62	1	2				0	1
P46100	ATRX	167.92	2.01	3	5				0	1
Q92769	HDAC2	217.33	13.52	5	11				0	1
Q13148	TARDBP	391.54	15.22	4	13				0	1
P55769	NHP2L1	77.57	9.38	1	3				0	1
P55198	MLLT6	105.91	2.84	2	4				0	1
Q14839	CHD4	71.84	2.88	3	4				0	1
P46087	NOP2	159.53	5.42	3	6				0	1
Q15287	RNPS1	928.59	22.62	5	51				0	1
P55197	MLLT10	333.27	10.96	5	21				0	1
P61247	RPS3A	493.22	21.97	6	22				0	1
P0CG48	UBC	79.64	28.91	2	4				0	1
Q13595	TRA2A	155.66	12.06	3	10				0	1
P62888	RPL30	565.02	10.43	1	24				0	1
O75934	BCAS2	317.25	34.22	5	15				0	1
P60866	RPS20	291.43	25.21	4	29				0	1
Q16629	SRSF7	314.6	19.75	4	20				0	1
P41223	BUD31	56.15	13.89	1	3				0	1
P56537	EIF6	676.59	26.94	4	33				0	1
P49207	RPL34	65.85	13.68	3	11				0	1
Q5JTH9	RRP12	145.22	5.17	4	5				0	1
Q12906	ILF3	106.12	5.26	4	6				0	1
Q12905	ILF2	194.5	7.69	2	4				0	1
Q9NV31	IMP3	86.01	8.15	1	2				0	1
Q14112	NID2	1021.17	21.82	15	48				0	1
Q8IV32	CCDC71	58.83	4.5	2	3				0	1
Q9HCS7	XAB2	44.05	1.99	1	2				0	1
P31431	SDC4	169.28	19.19	3	7				0	1
O43390	HNRNPR	147.65	12.01	5	10				0	1
P23527	HIST1H2BO	16754.17	60.32	9	612	411.05	11.9	1	8	1
P09874	PARP1	385.34	15.38	8	20				0	1
Q9UQ35	SRRM2	1594.13	13.34	23	80				0	1
Q15050	RRS1	1811.16	44.11	16	91				0	1
Q00839	HNRNPU	702.89	15.76	7	24				0	1
Q13243	SRSF5	52	3.31	1	3				0	1
Q9NVA2	SEPTIN11	111.14	11.42	4	6				0	1
O43482	OIP5	98.38	7.86	1	2				0	1
P82650	MRPS22	124.01	8.89	2	3				0	1
O43290	SART1	317.36	14.63	7	12				0	1
Q16695	HIST3H3	822.51	58.09	11	99	32.83	6.62	1	1	1
Q9NX58	LYAR	107.41	9.5	2	3				0	1
P09234	SNRPC	128.1	13.21	1	3				0	1
Q13435	SF3B2	39.58	5.36	2	4				0	1
Q8IY81	FTSJ3	446.63	21.49	10	23				0	1
Q8NC56	LEMD2	142.95	9.74	2	5				0	1
Q8IVT2	MISP	618.53	33.43	12	40				0	1
O60306	AQR	286.9	5.52	4	11				0	1
P36578	RPL4	2919.14	35.83	21	201				0	1
P46776	RPL27A	265.38	32.43	4	24	68.41	7.43	1	3	1
P46777	RPL5	455.73	30.3	9	36				0	1
Q8IX01	SUGP2	148.28	11.92	5	13				0	1
P46778	RPL21	1576.5	33.13	5	76	277.4	27.5	3	7	1
P46779	RPL28	184.89	7.3	1	26	33.28	8.03	1	2	1
Q6P2Q9	PRPF8	2043.63	25.44	39	101				0	1
P84103	SRSF3	210.99	28.66	4	14				0	1
P63267	ACTG2	162.78	9.31	3	7	87.58	7.18	2	2	0.99
Q562R1	ACTBL2	139.63	6.38	2	5	87.58	7.18	2	2	0.94
P62854	RPS26	116.34	13.04	1	5	84.65	13.04	1	2	0.94
P47914	RPL29	144.99	9.43	1	7	75.59	9.43	1	3	0.89
P10412	HIST1H1E	2771.81	33.33	14	123	1383.94	26.48	9	49	0.71

## Sheet: Table S4
Table S4. HMGB1 interactome in the nuclear fraction of PC-3 cells
		HMGB1 immunoprecipitation				Rabbit immunoprecipitation
PROTID	GENE	Score	Coverage	Peptides	Spectra	Score	Coverage	Peptides	Spectra	SP
Q8WV44	TRIM41	113.88	4.6	2	3				0	1
Q9Y3U8	RPL36	2182.32	31.43	7	148	60.42	23.81	2	3	1
P62753	RPS6	2299.23	26.91	8	92	602.75	20.88	6	23	1
P62750	RPL23A	617.24	35.9	8	39	150.49	8.33	1	3	1
Q92769	HDAC2	209.76	11.27	5	14				0	1
Q8IUE6	HIST2H2AB	4547.09	72.31	8	227	235.39	29.23	2	10	1
Q14247	CTTN	1654.54	27.09	10	49				0	1
Q9Y2R5	MRPS17	24.65	6.92	1	2				0	1
Q9Y2R9	MRPS7	42.14	9.09	2	3				0	1
P07910	HNRNPC	3803.49	31.37	10	112	123.74	5.23	1	2	1
Q2TB10	ZNF800	125.37	4.82	2	15				0	1
P0C0S5	H2AFZ	4947.17	56.25	6	278	239.92	53.91	5	17	1
Q9NQS7	INCENP	76.87	3.16	2	3				0	1
P02545	LMNA	99.4	3.77	2	3				0	1
P40429	RPL13A	1321.67	36.45	10	120	168.63	22.66	6	12	1
Q9Y676	MRPS18B	24.16	12.79	1	2				0	1
Q14141	SEPTIN6	231.28	13.36	4	18				0	1
P05386	RPLP1	267.41	14.04	1	13				0	1
P05387	RPLP2	1288.32	80	8	64	84.53	28.7	1	4	1
P05388	RPLP0	4487.24	40.69	9	166	294.47	11.04	3	6	1
P78345	RPP38	41.02	3.89	1	4				0	1
P62877	RBX1	209.1	17.59	2	5				0	1
Q9NVA2	SEPTIN11	491.53	11.66	5	23				0	1
O00567	NOP56	611.36	11.95	5	13				0	1
P07355	ANXA2	228.2	10.91	3	11				0	1
O76021	RSL1D1	415.38	23.27	9	27				0	1
P52272	HNRNPM	3593.24	40.14	16	234	265.19	13.7	7	10	1
P67809	YBX1	264.7	9.26	1	8				0	1
P62913	RPL11	832.69	21.35	4	47	223.65	22.47	4	8	1
Q15361	TTF1	39.4	1.33	1	4				0	1
Q9UMS4	PRPF19	379.93	36.51	10	35				0	1
Q14669	TRIP12	221.81	1.51	2	5				0	1
P39023	RPL3	7588.42	32.51	12	386	383.86	24.81	7	15	1
O75531	BANF1	345.03	26.97	1	20				0	1
P09651	HNRNPA1	162.42	4.3	1	4				0	1
Q6DKI1	RPL7L1	57.76	5.69	1	2				0	1
P62805	HIST1H4A	26815.92	65.05	14	1199	1234.22	57.28	10	56	1
O94776	MTA2	91.57	7.04	4	7				0	1
P27635	RPL10	1249.3	22.9	6	72	367.99	15.42	4	12	1
Q99880	HIST1H2BL	17015.32	57.14	11	632	869.2	27.78	4	25	1
P63220	RPS21	142.63	19.28	2	5				0	1
Q5BKZ1	ZNF326	86.33	6.01	2	2				0	1
P11142	HSPA8	596.19	16.25	7	25				0	1
Q71DI3	HIST2H3A	2675.06	66.91	15	278	72.13	24.26	4	11	1
Q13601	KRR1	126.7	17.85	5	9				0	1
P62899	RPL31	431.65	33.6	4	29	93.06	17.6	2	4	1
P18077	RPL35A	192.55	32.73	5	23				0	1
P62266	RPS23	686.82	16.08	3	32	146.96	16.08	2	4	1
P62263	RPS14	1661.13	41.72	8	126	133.14	25.17	3	8	1
P62269	RPS18	2017.91	59.21	11	146	368.82	41.45	7	18	1
O75643	SNRNP200	168.72	2.06	4	6				0	1
Q92522	H1FX	115.64	8.45	1	3				0	1
P06748	NPM1	4216.95	47.28	12	303	216.11	36.39	5	17	1
Q08945	SSRP1	296.38	5.08	2	19				0	1
Q562R1	ACTBL2	238.93	11.17	3	8	87.93	4.26	1	2	1
Q9H0A0	NAT10	697.59	19.32	13	47				0	1
Q9Y3Y2	CHTOP	135.6	16.94	3	8	21.84	6.45	1	2	1
Q02878	RPL6	4997.34	52.08	19	260	357.24	30.21	8	26	1
P07196	NEFL	54.11	1.66	1	5				0	1
Q96QD9	FYTTD1	52.78	6.92	2	2				0	1
Q9Y2Q9	MRPS28	35.75	5.35	1	2				0	1
P56182	RRP1	34.11	5.42	2	2				0	1
O75367	H2AFY	875.71	27.42	5	49	30.81	2.42	1	1	1
Q9H7B2	RPF2	119.89	15.69	4	8				0	1
Q96HH9	GRAMD3	316.23	13.66	3	11				0	1
P62841	RPS15	1685.38	37.24	4	65	232.48	15.17	1	9	1
P61353	RPL27	873.48	49.26	7	90	69.37	20.59	3	4	1
P62847	RPS24	1486.84	39.85	7	91	80.15	15.04	3	5	1
P38919	EIF4A3	404.25	28.47	10	37	101.69	3.16	1	2	1
Q9BXS6	NUSAP1	72.83	5.67	2	2				0	1
P18206	VCL	35.66	1.32	1	3				0	1
Q6FI13	HIST2H2AA3	12989.63	70.77	11	851	755.15	57.69	7	39	1
P62318	SNRPD3	38.41	15.08	2	2				0	1
Q13428	TCOF1	167.43	4.17	5	9				0	1
P62314	SNRPD1	105.57	16.81	1	5				0	1
Q9BQG0	MYBBP1A	485.32	10.54	8	22				0	1
Q9HCI7	MSL2	158.37	7.28	3	8				0	1
P43243	MATR3	865.51	27.27	12	63				0	1
Q66PJ3	ARL6IP4	27.51	4.51	1	3				0	1
P0CW22	RPS17L	1398.9	45.93	6	65	26.64	7.41	1	1	1
Q9UKV3	ACIN1	109.01	1.34	1	2				0	1
Q13547	HDAC1	102.5	11.41	5	15				0	1
Q9Y3D9	MRPS23	44.86	7.37	2	3				0	1
P62995	TRA2B	209.83	14.93	3	14				0	1
Q16181	SEPTIN7	1160.96	25.17	8	62				0	1
Q8N257	HIST3H2BB	14953.02	55.56	8	513	857.41	26.19	4	24	1
Q9BYN8	MRPS26	132	8.78	1	6				0	1
Q13835	PKP1	189.52	6.56	4	8				0	1
P84098	RPL19	1565.96	22.96	6	101	271.26	17.86	3	7	1
Q9H6R4	NOL6	286.22	11.78	7	19				0	1
Q8TDN6	BRIX1	968.05	45.61	10	126				0	1
Q96L21	RPL10L	309.53	23.36	3	27	20.39	5.14	1	1	1
P55060	CSE1L	281.59	0.82	1	23				0	1
O43290	SART1	253.12	7	3	7				0	1
Q02543	RPL18A	222.77	32.39	8	39	24.86	9.66	2	4	1
Q9BRT6	LLPH	195.78	23.26	2	12				0	1
O76031	CLPX	215.36	22.27	9	17				0	1
P61313	RPL15	1861.04	34.31	7	179	199.3	25.98	5	10	1
Q9NUQ6	SPATS2L	416.83	13.08	5	21				0	1
P14866	HNRNPL	72.08	10.87	2	5				0	1
P49458	SRP9	187.32	22.09	2	7				0	1
Q13263	TRIM28	1335.89	25.15	11	55				0	1
P15880	RPS2	674.49	26.28	10	71	105.02	11.6	3	8	1
Q96KM6	ZNF512B	407.19	15.81	10	25				0	1
P42766	RPL35	1198.96	22.76	5	82	310.11	21.95	3	12	1
P22626	HNRNPA2B1	559.82	20.96	4	28	55.63	12.75	3	4	1
Q6PK04	CCDC137	155.05	9.69	2	3				0	1
Q9UKM9	RALY	1047.55	31.7	7	47				0	1
Q9NYP9	MIS18A	29.5	4.29	1	4				0	1
Q9UIG0	BAZ1B	45.19	2.49	3	3				0	1
P17096	HMGA1	78.59	23.36	1	12				0	1
O75494	SRSF10	253.11	10.69	2	13				0	1
P38646	HSPA9	50.34	2.06	1	2				0	1
O60506	SYNCRIP	238.18	6.74	5	13				0	1
P62701	RPS4X	2899.68	46.39	13	190	112.35	22.81	5	9	1
P16402	HIST1H1D	3625.72	32.13	12	169	1440.79	26.7	9	52	1
P68431	HIST1H3A	3124.53	66.91	15	297	138.01	47.79	5	17	1
P62277	RPS13	1406.43	46.36	9	83	252.21	31.13	5	12	1
P46013	MKI67	204.77	3.78	8	13				0	1
P62273	RPS29	148.46	33.93	2	9	56.87	14.29	1	2	1
Q9BRJ6	C7orf50	38.48	35.57	3	6				0	1
O43159	RRP8	146.79	3.51	1	2				0	1
Q03701	CEBPZ	53.27	2.18	2	4				0	1
Q09028	RBBP4	244.4	13.18	4	9				0	1
Q9NYF8	BCLAF1	33.53	7.5	4	5				0	1
P37108	SRP14	527.48	20.59	2	14				0	1
Q5SSJ5	HP1BP3	567.61	18.08	7	20	90.96	6.33	2	2	1
Q14137	BOP1	76.6	1.34	1	2				0	1
Q01082	SPTBN1	47.03	0.42	1	2				0	1
P62280	RPS11	425.25	38.61	6	47	151.42	27.85	4	12	1
P25398	RPS12	763.22	37.12	6	56	218.6	22.73	2	8	1
P46783	RPS10	882.68	43.03	8	53	240.71	24.24	4	10	1
P46782	RPS5	302	21.08	5	15				0	1
P46781	RPS9	673.57	42.27	13	79	66.79	15.46	4	5	1
P26373	RPL13	1845.76	45.5	11	119	611.3	45.02	11	31	1
Q3KR37	GRAMD1B	31.27	2.98	1	4				0	1
Q99549	MPHOSPH8	59.98	8.14	4	6				0	1
Q99459	CDC5L	355.58	14.84	7	12				0	1
Q8IV32	CCDC71	113.48	5.35	2	4				0	1
Q13185	CBX3	154.62	8.74	1	2				0	1
P09429	HMGB1	801.05	23.26	10	78				0	1
Q9BVP2	GNL3	154.92	8.56	3	11	23.04	3.1	1	1	1
P82675	MRPS5	46.54	3.26	1	2				0	1
P62851	RPS25	528.1	24	3	25	98.81	7.2	1	2	1
P18621	RPL17	1637.13	41.3	9	114	108.61	21.2	4	9	1
P61326	MAGOH	38.02	19.18	2	3				0	1
P62854	RPS26	236.34	13.04	1	15	130.32	20.87	2	5	1
P62857	RPS28	357.1	59.42	7	28	81.04	34.78	2	5	1
Q93077	HIST1H2AC	11813.07	70.77	9	724	781.71	57.69	7	34	1
P52597	HNRNPF	151.28	7.23	2	7				0	1
P62910	RPL32	637.6	25.19	6	60	46.18	12.59	2	6	1
P06899	HIST1H2BJ	15544.93	57.14	9	553	857.41	26.19	4	24	1
P62917	RPL8	782.87	26.85	9	65				0	1
P31943	HNRNPH1	655.5	14.25	5	19				0	1
Q15029	EFTUD2	60.74	1.34	1	2				0	1
Q96RR1	C10orf2	3052.45	30.7	17	134				0	1
Q86V81	ALYREF	689.39	28.4	6	26				0	1
Q6PL18	ATAD2	1463.57	20.29	19	80				0	1
Q8NEY8	PPHLN1	21.93	5.46	3	3				0	1
P23396	RPS3	4112.82	62.14	14	298	298.07	40.74	7	15	1
P35268	RPL22	1258.3	62.5	7	68	111.43	19.53	2	6	1
Q9Y5B9	SUPT16H	857.62	19.2	15	44				0	1
P32969	RPL9	1372.47	28.13	5	75	83.6	5.73	1	4	1
Q13242	SRSF9	39.77	10.86	2	4				0	1
P62424	RPL7A	3707.68	37.22	15	192	333.14	21.8	7	13	1
P61254	RPL26	468.62	42.76	9	63	34.72	11.72	2	3	1
Q14980	NUMA1	976.23	13.85	17	46				0	1
Q9Y3B9	RRP15	62.26	3.9	1	2				0	1
Q9UNL4	ING4	84.64	11.24	2	5				0	1
Q9P0V9	SEPTIN10	230.88	6.83	3	8				0	1
Q9NW13	RBM28	139.27	4.08	2	4				0	1
Q09666	AHNAK	961.46	15.69	34	82				0	1
P30414	NKTR	373.93	7.46	7	26				0	1
P38159	RBMX	1459.74	22.76	9	70				0	1
Q68DK7	MSL1	153.96	5.7	2	9				0	1
Q9H307	PNN	501.67	12.41	6	36	37.04	2.37	1	2	1
Q8WWQ0	PHIP	2753.66	21.03	26	192				0	1
Q02880	TOP2B	724.45	10.89	12	31				0	1
P52815	MRPL12	60.4	40.91	4	8				0	1
Q9NQ55	PPAN	64.2	5.29	2	3				0	1
Q07020	RPL18	2926.74	41.49	11	111	305.19	28.72	5	12	1
Q9Y2W1	THRAP3	308.61	5.45	3	16	38.66	2.09	1	2	1
P42677	RPS27	168.78	30.95	3	12	101.7	15.48	1	2	1
P11387	TOP1	2557.83	28.5	18	168	30.48	2.09	1	2	1
Q9P0M6	H2AFY2	297.66	22.58	4	28	30.81	2.42	1	1	1
Q14684	RRP1B	423.64	26.12	10	28	25.66	1.45	1	1	1
P11388	TOP2A	824.29	11.95	13	33				0	1
P51398	DAP3	132.1	3.77	1	2				0	1
P08865	RPSA	624.61	18.31	4	18	29.68	2.71	1	1	1
P62829	RPL23	1136.57	19.29	5	66	203.89	19.29	4	10	1
P07305	H1F0	968.1	19.07	4	32	292.02	19.59	4	8	1
P51991	HNRNPA3	200.4	10.05	2	4				0	1
P18583	SON	167.74	5.65	7	12				0	1
Q9P2J5	LARS	21.01	0.85	1	2				0	1
Q9BZE4	GTPBP4	73.69	3.47	2	4				0	1
Q92599	SEPTIN8	161.09	3.52	2	10				0	1
P50914	RPL14	4018.02	31.63	7	116	202.24	19.53	3	7	1
P82979	SARNP	93.28	13.81	2	3				0	1
P61513	RPL37A	1272.18	29.35	2	40	134.93	19.57	1	3	1
O43660	PLRG1	196.96	10.12	2	3				0	1
P62081	RPS7	2629.95	51.03	11	182	69.93	5.67	1	2	1
P62241	RPS8	1673.3	39.9	8	91	449.63	32.69	6	15	1
P62244	RPS15A	468.07	43.85	7	50	57.83	6.92	1	2	1
P62249	RPS16	2014.5	58.22	11	140	210.82	42.47	7	18	1
Q9H6F5	CCDC86	137.08	32.22	7	15				0	1
Q9UHD8	SEPTIN9	1688.34	36.01	17	104				0	1
Q5T3I0	GPATCH4	37.11	1.79	1	2				0	1
P18124	RPL7	2169.24	50	17	188	238.29	23.39	7	14	1
P16403	HIST1H1C	3933.27	33.33	12	176	1674.74	27.7	10	61	1
Q03188	CENPC	23.1	2.23	2	4				0	1
P17480	UBTF	87.98	4.45	3	8	39.76	2.36	1	2	1
Q9NWH9	SLTM	342.49	4.74	4	9				0	1
P18827	SDC1	322.49	17.74	4	10				0	1
P10412	HIST1H1E	4031.69	36.53	13	179	1700.5	26.94	10	62	1
P30050	RPL12	7534.94	24.24	3	196	179.12	18.79	2	7	1
Q86YZ3	HRNR	102.12	2.88	2	10				0	1
Q9Y2X3	NOP58	44.2	4.73	2	3				0	1
P84243	H3F3A	1922.41	66.91	15	218	72.13	24.26	4	11	1
P62906	RPL10A	3295.04	36.87	11	261	146.11	23.96	5	15	1
P83731	RPL24	823.03	29.94	7	49	307.14	21.66	4	10	1
Q9Y5J1	UTP18	89.36	2.34	1	2				0	1
P62861	FAU	93.08	20.34	4	18	52	18.64	2	5	1
P19338	NCL	3489.6	31.27	18	178	874.4	24.23	13	37	1
Q15019	SEPTIN2	944.4	30.19	9	50				0	1
Q15397	KIAA0020	103.08	2.47	1	2				0	1
Q96PK6	RBM14	392.23	12.26	6	18				0	1
Q9BQE3	TUBA1C	141.52	7.35	2	4				0	1
P45973	CBX5	39.09	4.19	1	2				0	1
Q16576	RBBP7	129.48	12.94	4	9				0	1
Q9Y265	RUVBL1	46.41	5.04	2	3				0	1
P39019	RPS19	959.11	55.86	10	74	131.94	20	3	6	1
Q9Y2J4	AMOTL2	31.7	1.16	1	2				0	1
Q9Y6M1	IGF2BP2	75.25	4.84	2	4				0	1
P46100	ATRX	286.19	3.57	6	10				0	1
P28370	SMARCA1	46.74	3.42	4	5				0	1
O43823	AKAP8	54.01	1.59	1	3				0	1
Q13148	TARDBP	260.73	6.52	2	5				0	1
P55769	NHP2L1	103.17	9.38	1	3				0	1
P55198	MLLT6	96.66	3.02	2	3				0	1
P08107	HSPA1A	197.23	4.52	2	7				0	1
P46087	NOP2	397.86	19.21	9	21				0	1
Q15287	RNPS1	70.87	7.54	2	4				0	1
P55197	MLLT10	87.68	6.46	3	8				0	1
P61247	RPS3A	1403.45	47.73	16	78	250.68	20.83	6	12	1
P0CG48	UBC	50.54	43.36	4	7				0	1
Q13595	TRA2A	138.84	4.96	1	6				0	1
P62888	RPL30	890.8	10.43	2	65	121.14	10.43	1	4	1
O75934	BCAS2	183.08	44	6	12				0	1
P60866	RPS20	763.5	25.21	3	71	105.36	22.69	2	4	1
Q16629	SRSF7	281.28	19.75	3	20				0	1
O94913	PCF11	21.53	0.9	1	3				0	1
P56537	EIF6	405.9	26.94	4	15				0	1
P83881	RPL36A	107.33	28.3	3	6				0	1
P49207	RPL34	94.52	14.53	4	19	48.18	6.84	1	3	1
Q8N9T8	KRI1	209.06	8.39	4	6				0	1
Q5JTH9	RRP12	119.9	4.47	4	6				0	1
Q12906	ILF3	2387.92	23.94	15	122				0	1
Q12905	ILF2	697.63	20.77	6	35				0	1
P31431	SDC4	148.78	18.69	3	6				0	1
O43395	PRPF3	157.39	10.25	4	10				0	1
O43390	HNRNPR	933.43	16.9	11	51				0	1
Q99575	POP1	158.5	4	3	7				0	1
P09874	PARP1	1568.78	30.18	21	93				0	1
Q9UQ35	SRRM2	276.77	5.27	9	18				0	1
Q15050	RRS1	727.48	16.71	3	24				0	1
Q00839	HNRNPU	4560.88	29.82	24	310				0	1
Q13247	SRSF6	60.06	5.23	2	5				0	1
Q6P0N0	MIS18BP1	190.75	6.36	3	8				0	1
Q9UL40	ZNF346	47.02	4.42	1	3				0	1
O43482	OIP5	109.89	13.97	2	3				0	1
P82650	MRPS22	153.54	3.33	1	3				0	1
Q14690	PDCD11	184.92	2.62	5	8				0	1
O95793	STAU1	33.44	2.77	1	2				0	1
Q9NX58	LYAR	110.7	3.69	1	2				0	1
P36873	PPP1CC	145.94	7.43	2	4				0	1
Q8IY81	FTSJ3	767.36	19.36	11	42				0	1
Q8NC56	LEMD2	147.38	12.13	3	4				0	1
Q8IVT2	MISP	25.25	1.62	1	2				0	1
P36578	RPL4	3924.2	38.17	21	310	294.09	23.65	9	23	1
P46776	RPL27A	889.78	39.86	7	67	163.23	23.65	4	13	1
P46777	RPL5	1689.25	30.3	13	98	85.01	4.71	1	3	1
P46778	RPL21	1343.2	33.13	4	80	346.22	21.25	4	13	1
P46779	RPL28	442.28	29.93	3	38	65.46	15.33	2	5	1
Q14978	NOLC1	130.93	6.72	4	6	26.82	1.57	1	1	1
Q9NRW3	APOBEC3C	477.01	17.89	3	22	47.58	6.32	1	2	1
Q6P2Q9	PRPF8	48.57	4.03	4	4				0	1
Q16740	CLPP	44.79	16.61	2	3				0	1
P84103	SRSF3	87.37	28.66	3	8				0	1
P47914	RPL29	250.34	9.43	1	9	145.26	9.43	1	3	0.99

## Sheet: Table S5
Table S5. HMGB1 interactome in the cytoplasmic fraction of SKOV-3 cells
		HMGB1 immunoprecipitation				Rabbit immunoprecipitation
PROTID	GENE	Score	Coverage	Peptides	Spectra	Score	Coverage	Peptides	Spectra	SP
P08779	KRT16	601.14	30.02	11	25	67.11	5.92	3	4	1
P18621	RPL17	76.09	18.48	3	5				0	1
P62854	RPS26	81.5	13.04	1	3				0	1
P62857	RPS28	100.93	17.39	1	2				0	1
Q9Y3U8	RPL36	168.25	21.9	3	5				0	1
P0CW22	RPS17L	112.97	23.7	2	4				0	1
P83111	LACTB	71.57	4.2	2	3				0	1
P62424	RPL7A	478.03	29.32	8	20	71.63	4.89	1	1	1
P30050	RPL12	87.87	9.7	1	5				0	1
P11940	PABPC1	325.56	10.69	6	11				0	1
Q86YZ3	HRNR	605.85	1.26	2	32				0	1
P35527	KRT9	7557.69	56.82	32	394	1406.61	41.73	15	64	1
P11137	MAP2	88.31	2.57	3	4				0	1
P62753	RPS6	270.25	18.07	5	11				0	1
Q16181	SEPTIN7	8671.77	66.13	32	403				0	1
Q14247	CTTN	5552.28	44.55	29	225				0	1
P62906	RPL10A	57.15	17.97	4	11				0	1
P83731	RPL24	77.7	13.38	2	3				0	1
Q00577	PURA	45.63	27.64	2	5				0	1
P23396	RPS3	200.96	23.05	4	8	49.44	5.35	1	1	1
P62861	FAU	97.34	18.64	2	8				0	1
P84098	RPL19	210.42	13.27	3	10				0	1
P19338	NCL	424.58	11.69	6	15				0	1
Q15019	SEPTIN2	10768.79	80.33	27	484				0	1
O60568	PLOD3	382.23	9.21	5	12				0	1
Q5VZK9	LRRC16A	300.82	7.08	7	13				0	1
P23258	TUBG1	294.96	26.83	6	17				0	1
P40429	RPL13A	93.49	15.27	3	9				0	1
Q14141	SEPTIN6	1709.33	36.87	18	108				0	1
P35908	KRT2	3326.99	49.61	24	161	1493.65	40.69	19	61	1
P05386	RPLP1	48.41	14.04	1	3				0	1
P05388	RPLP0	310.17	25.87	5	10				0	1
P39019	RPS19	156.8	22.76	3	4				0	1
P62910	RPL32	56.67	11.11	1	3				0	1
Q9UHD8	SEPTIN9	8047.62	70.82	50	488				0	1
P46776	RPL27A	84.28	7.43	1	3				0	1
Q9Y6M1	IGF2BP2	690.12	24.71	11	25	33.33	2	1	1	1
P62280	RPS11	100.38	18.99	3	9				0	1
P61254	RPL26	34.9	6.21	1	2				0	1
P67809	YBX1	664.7	33.95	5	28	338.91	15.12	2	6	1
P62913	RPL11	174.34	12.92	2	5				0	1
Q6NZ67	MZT2B	181.01	35.44	3	7				0	1
O15014	ZNF609	182.99	5.24	4	7				0	1
Q9P0V9	2010-09-01	1945.61	52.42	18	103				0	1
Q8NHV4	NEDD1	875.51	22.27	9	29				0	1
P62917	RPL8	94.65	4.28	1	2				0	1
Q09666	AHNAK	3375.34	39.46	95	259				0	1
P13674	P4HA1	81.82	8.99	2	2				0	1
P39023	RPL3	218.89	15.88	5	21	27.7	6.7	1	3	1
Q14444	CAPRIN1	55.69	5.92	1	2				0	1
P61313	RPL15	180.3	13.73	3	6				0	1
Q14764	MVP	268	21.05	9	20				0	1
Q99719	SEPTIN5	130.5	12.2	3	7				0	1
P61247	RPS3A	191.73	12.5	3	7				0	1
A0JNW5	UHRF1BP1L	204.17	3.55	3	6				0	1
P13645	KRT10	3786.74	42.64	29	179	1613.75	32.71	15	61	1
Q9HCE1	MOV10	229	4.99	3	5				0	1
P27635	RPL10	268.03	6.54	2	7				0	1
P62266	RPS23	109.75	7.69	1	2				0	1
Q07020	RPL18	396.44	25	4	11				0	1
P60866	RPS20	24.43	19.33	2	3				0	1
P62081	RPS7	119.73	32.47	3	10				0	1
P11142	HSPA8	336.57	15.48	7	16	80.6	2.01	1	2	1
P15880	RPS2	65.1	11.6	3	6				0	1
O94913	PCF11	40.14	0.58	1	2				0	1
Q53EZ4	CEP55	227.48	13.58	4	15				0	1
P42766	RPL35	142.15	21.95	3	7				0	1
P49207	RPL34	31.04	6.84	1	3				0	1
Q86V48	LUZP1	746.76	17.38	14	35				0	1
P05387	RPLP2	170.92	42.61	2	9				0	1
Q9UJF2	RASAL2	55.25	1.14	1	2				0	1
Q13310	PABPC4	262.39	11.02	5	9				0	1
P62899	RPL31	180.28	18.4	2	5				0	1
P18077	RPL35A	59.83	9.09	1	2				0	1
P62750	RPL23A	88.66	13.46	2	5				0	1
Q02809	PLOD1	1264.29	28.47	15	60				0	1
P62269	RPS18	176.7	19.08	3	8				0	1
P62829	RPL23	226.46	12.86	1	6				0	1
P27816	MAP4	132.7	3.13	3	6				0	1
P62701	RPS4X	61.35	13.69	3	4				0	1
Q13085	ACACA	1866.86	22.63	37	88				0	1
Q9NVA2	SEPTIN11	3682.53	50.82	27	203				0	1
P62277	RPS13	134.83	12.58	2	5				0	1
Q02878	RPL6	343.81	37.85	9	18				0	1
Q92599	SEPTIN8	2665.44	47.62	20	168				0	1
O95793	STAU1	71.1	6.07	2	3				0	1
P50914	RPL14	161.6	14.88	3	6				0	1
Q8NBJ5	COLGALT1	215.86	8.36	4	9				0	1
P47914	RPL29	105.41	9.43	1	3				0	1
P25398	RPS12	145.46	22.73	2	4				0	1
P46783	RPS10	79.75	5.45	1	2				0	1
P46781	RPS9	58.81	21.13	5	6				0	1
P26373	RPL13	284.17	24.17	5	13	88.25	5.21	1	2	1
P62241	RPS8	287.59	18.75	3	10				0	1
P36578	RPL4	175.08	19.44	6	13				0	1
P62244	RPS15A	39.42	6.92	1	2				0	1
P62249	RPS16	59.91	30.82	5	7				0	1
P02533	KRT14	1045.18	31.99	12	37	248.74	13.35	5	10	1
P52907	CAPZA1	73.52	8.39	2	3				0	1
P62841	RPS15	245.02	15.17	1	8				0	1
P61353	RPL27	146.16	27.94	4	8				0	1
P62847	RPS24	53.88	9.02	2	2				0	1
P04264	KRT1	13054.24	61.8	45	598	2881.58	48.29	23	102	1
P46778	RPL21	193.95	27.5	3	8				0	1
Q93062	RBPMS	53.56	22.96	3	6				0	1
P18124	RPL7	357.78	35.89	8	23				0	1
P09429	HMGB1	2991.55	27.91	14	193				0	1
P11021	HSPA5	269.54	15.29	7	11				0	1
Q9UPS8	ANKRD26	89.24	3.22	5	7				0	1
P62851	RPS25	109.6	15.2	2	5	25.07	8	1	1	0.99
P13647	KRT5	1050.57	27.29	16	51	416.12	14.41	9	19	0.99
Q562R1	ACTBL2	136.41	9.04	2	5	46.4	4.26	1	1	0.99
Q7Z794	KRT77	1410.87	5.36	4	65	507.65	5.36	4	25	0.96
P02668	P02668	142.36	16.57	2	4	28.72	5.92	1	1	0.96
P63267	ACTG2	122.28	8.51	2	4	46.4	4.26	1	1	0.96
P63173	RPL38	84.85	18.57	1	3	34.78	14.29	1	1	0.89
P42677	RPS27	98.12	29.76	2	5	99.13	15.48	1	2	0.79

## Sheet: Table S6
Table S6. HMGB1 interactome in the cytoplasmic fraction of PC-3 cells
		HMGB1 immunoprecipitation				Rabbit immunoprecipitation
PROTID	GENE	Score	Coverage	Peptides	Spectra	Score	Coverage	Peptides	Spectra	SP
P0CW22	RPS17L	50.45	16.3	1	3					1
P62424	RPL7A	192.29	12.03	3	7	59.81	4.89	1	1	1
P11940	PABPC1	662.84	28.62	13	36	77.97	4.09	3	4	1
Q16181	SEPTIN7	16061.22	70.71	37	686					1
Q14247	CTTN	7110.39	53.27	36	312					1
P83731	RPL24	159.71	13.38	2	3					1
P62861	FAU	53.54	18.64	2	6					1
Q96EY5	MVB12A	155.5	13.19	2	5				0	1
Q15019	SEPTIN2	15905.16	81.72	28	715				0	1
P23258	TUBG1	91.49	21.95	6	10				0	1
P40429	RPL13A	26.05	15.27	3	3					1
Q14141	SEPTIN6	2914.03	43.55	23	184				0	1
P05387	RPLP2	57.88	28.7	1	3				0	1
P05388	RPLP0	97.57	7.26	2	3				0	1
Q9UHD8	SEPTIN9	15282.99	70.48	58	1007				0	1
Q9Y6M1	IGF2BP2	1302.43	35.06	17	75	48.32	4.17	2	3	1
Q15366	PCBP2	152.68	17.53	3	6				0	1
Q99816	TSG101	174.0	17.44	4	9				0	1
Q9P0V9	SEPTIN10	4933.48	68.06	25	263				0	1
Q8NHV4	NEDD1	558.36	17.42	6	16				0	1
Q09666	AHNAK	2330.15	31.66	70	163				0	1
Q9Y520	PRRC2C	43.8	1.48	3	4				0	1
Q14444	CAPRIN1	292.4	12.27	5	12				0	1
Q99719	SEPTIN5	422.12	21.14	7	26				0	1
Q07020	RPL18	151.24	18.09	3	4				0	1
P62081	RPS7	84.15	32.47	3	8				0	1
Q53EZ4	CEP55	2472.49	49.78	20	134				0	1
Q07157	TJP1	311.85	9.73	11	16				0	1
Q86V48	LUZP1	213.42	5.86	4	7				0	1
P16989	YBX3	233.01	30.11	7	14	44.26	6.18	2	3	1
Q9BY89	KIAA1671	548.45	9.75	11	21				0	1
Q96Q06	PLIN4	1243.98	20.56	14	51				0	1
Q9H9H4	VPS37B	500.54	35.79	5	17				0	1
O60506	SYNCRIP	235.63	6.1	3	5				0	1
Q13085	ACACA	1005.77	12.87	21	46				0	1
Q9NVA2	SEPTIN11	5017.86	52.91	31	282				0	1
Q02878	RPL6	29.71	9.03	3	5				0	1
Q92599	SEPTIN8	1543.58	36.65	16	119				0	1
P47756	CAPZB	66.74	7.22	1	3				0	1
P47914	RPL29	67.9	9.43	1	3				0	1
A5YKK6	CNOT1	40.72	1.18	2	3				0	1
Q9UK41	VPS28	140.78	30.77	4	12				0	1
P26373	RPL13	174.47	20.38	4	10				0	1
P18124	RPL7	101.25	23.79	5	8				0	1
P62158	CALM1	83.11	20.13	1	3				0	1
P09429	HMGB1	4363.86	32.09	13	306				0	1
P11021	HSPA5	338.28	17.74	8	15	32.91	1.68	1	2	1
Q9UPS8	ANKRD26	366.35	10.77	13	21				0	1
Q9NZN8	CNOT2	69.41	3.15	1	2				0	0.99
P30050	RPL12	48.45	9.7	1	2				0	0.99
P61978	HNRNPK	52.23	3.67	1	2				0	0.99
P84098	RPL19	146.41	8.67	1	2				0	0.99
P62913	RPL11	51.68	5.06	1	2				0	0.99
Q6NZ67	MZT2B	94.74	13.92	1	2				0	0.99
Q9H444	CHMP4B	99.67	6.25	1	2				0	0.99
P61313	RPL15	69.28	6.86	1	2				0	0.99
O75531	BANF1	111.3	26.97	1	6				1	0.99
Q9HCE1	MOV10	78.4	2.89	2	2				0	0.99
P49207	RPL34	25.79	6.84	1	2				0	0.99
P62899	RPL31	45.03	7.2	1	2				0	0.99
P18077	RPL35A	27.43	9.09	1	2				0	0.99
P11387	TOP1	27.83	2.09	1	2				0	0.99
P26599	PTBP1	33.77	2.07	1	2				0	0.99
P62701	RPS4X	52.44	12.17	2	2				0	0.99
P62244	RPS15A	35.61	13.85	2	2				0	0.99
P46779	RPL28	43.86	8.03	1	2				0	0.99
O94964	SOGA1	60.96	1.34	2	2				0	0.99
O75175	CNOT3	46.34	2.52	1	2				0	0.99
Q9NUL3	STAU2	37.86	4.04	2	2				0	0.99
Q92900	UPF1	47.02	4.69	3	4				1	0.91
P62241	RPS8	162.31	12.5	2	4	70.28	7.21	1	1	0.91
P62753	RPS6	196.5	15.26	3	9	48.05	9.24	2	3	0.9
P39019	RPS19	232.0	27.59	4	9	85.73	12.41	2	3	0.9
P62280	RPS11	82.19	11.39	2	6	65.77	6.96	1	2	0.84
P60866	RPS20	61.86	22.69	2	6	36.27	12.61	1	2	0.84
P15880	RPS2	111.32	11.6	3	8	30.38	4.1	1	3	0.72

## Sheet: Table S7
Table S7. THOC5 interactome in PC-3 cells
		HMGB1 immunoprecipitation				Rabbit immunoprecipitation
PROTID	GENE	Score	Coverage	Peptides	Spectra	Score	Coverage	Peptides	Spectra	SP
P68366	TUBA4A	563.96	34.38	11	46	143.56	12.28	3	13	1
P40227	CCT6A	117.47	7.72	3	5					1
P13693	TPT1	91.45	27.33	1	5					1
P35527	KRT9	1586.5	44.46	19	73	507.94	22.63	7	20	1
P61978	HNRNPK	379.27	21.6	7	19	43.4	4.97	1	3	1
Q14247	CTTN	181.81	6.36	1	4					1
Q9BUF5	TUBB6	232.15	13.45	6	17	80.92	5.38	2	4	1
Q04637	EIF4G1	28.71	1.19	1	2					1
Q13200	PSMD2	40.53	3.52	2	3					1
Q9UHB9	SRP68	68.61	7.02	2	6					1
P30041	PRDX6	121.7	39.73	6	14	23.41	4.02	1	1	1
P07910	HNRNPC	196.12	16.01	4	7					1
P04259	KRT6B	2046.04	43.26	23	99	35.45	1.6	1	1	1
P05387	RPLP2	65.44	28.7	1	3					1
P05388	RPLP0	246.0	19.87	5	8					1
P52272	HNRNPM	475.7	20.27	10	19	166.44	4.25	2	3	1
P62328	TMSB4X	40.25	31.82	1	3					1
Q15365	PCBP1	162.7	14.33	4	6					1
O76003	GLRX3	54.28	7.76	1	2					1
O75533	SF3B1	38.17	1.23	1	2					1
O75531	BANF1	59.66	26.97	1	4					1
P08621	SNRNP70	94.08	7.78	2	3					1
P09651	HNRNPA1	349.26	25.81	7	20					1
Q12797	ASPH	164.95	2.37	1	3					1
P67936	TPM4	69.4	8.06	1	2					1
P63220	RPS21	67.02	12.05	1	2					1
P11142	HSPA8	1196.86	37.77	20	69	437.78	19.04	10	20	1
Q9Y597	KCTD3	800.92	18.65	12	41					1
Q9BY77	POLDIP3	112.73	6.41	2	4					1
P48643	CCT5	31.47	11.09	2	4					1
Q71DI3	HIST2H3A;HIS	230.85	47.79	5	23	66.65	13.24	2	5	1
Q9NR31	SAR1A	68.79	17.17	3	5					1
Q9UHD8	40057	194.46	21.33	7	13	34.8	2.56	1	2	1
Q13769	THOC5	1524.63	44.22	26	114					1
P18077	RPL35A	36.9	9.09	1	3					1
Q9BUJ2	HNRNPUL1	100.35	8.76	5	7					1
Q15181	PPA1	41.55	7.61	1	3					1
Q96K62	ZBTB45	222.36	10.37	4	18					1
P07814	EPRS	149.41	4.3	4	8					1
O95785	WIZ	82.64	3.69	3	4					1
P35579	MYH9	985.4	14.69	19	50	418.58	6.02	7	15	1
P06748	NPM1	620.35	50	9	36	258.8	21.77	3	9	1
Q9Y5S9	RBM8A	159.08	14.94	1	3					1
Q9Y3Y2	CHTOP	209.62	16.94	3	6	50.13	5.24	1	1	1
Q02878	RPL6	292.31	29.17	8	16	84.18	11.46	3	3	1
Q07955	SRSF1	66.07	17.34	3	6					1
Q15788	NCOA1	62.66	4.65	4	7					1
Q15046	KARS	95.5	2.68	1	2					1
O75367	H2AFY	46.86	7.8	2	5					1
P02538	KRT6A	2147.66	45.39	24	103	35.45	1.6	1	1	1
P02533	KRT14	1932.53	48.09	23	80	58.33	3.81	2	3	1
P52907	CAPZA1	81.04	11.19	2	5					1
P11586	MTHFD1	74.36	2.89	2	3					1
P61353	RPL27	60.81	22.06	3	6					1
P62847	RPS24	107.39	15.04	3	8					1
P04264	KRT1	3878.83	48.45	35	201	611.13	21.89	10	22	1
P38919	EIF4A3	308.39	21.9	7	17	58.87	3.89	1	3	1
P05198	EIF2S1	154.49	6.98	2	4					1
P62316	SNRPD2	36.3	9.32	2	3					1
P07437	TUBB	2102.92	60.14	20	112	760.71	30.63	10	37	1
P62491	RAB11A	60.65	15.74	3	4					1
P43243	MATR3	55.69	5.08	2	4					1
Q7Z794	KRT77	489.55	5.36	3	23	110.85	3.63	2	4	1
P22314	UBA1	122.75	6.71	4	6					1
Q8NI27	THOC2	2944.99	26.99	38	153					1
P30101	PDIA3	144.59	11.49	5	8					1
P27797	CALR	55.29	15.83	3	7					1
Q9Y5B9	SUPT16H	67.55	2.2	2	3					1
Q13547	HDAC1	36.66	4.98	2	3					1
P35609	ACTN2	75.49	3.24	3	4					1
P62140	PPP1CB	57.87	8.87	2	4					1
P62995	TRA2B	72.62	11.46	3	4					1
Q16181	SEPTIN7	75.68	6.41	2	3					1
Q7Z6B7	SRGAP1	730.23	23.96	19	49					1
Q96AG4	LRRC59	138.98	22.15	5	10					1
P17987	TCP1	130.9	13.85	4	9					1
Q92804	TAF15	56.32	2.87	2	3					1
Q9BX40	LSM14B	240.49	7.79	2	6					1
Q9H009	NACA2	120.27	6.98	1	3					1
O00151	PDLIM1	67.8	4.86	1	2					1
P62136	PPP1CA	52.44	5.45	1	2					1
P55060	CSE1L	119.07	3.71	3	7					1
P05141	SLC25A5	213.16	16.44	4	7					1
P62841	RPS15	238.3	36.55	3	10					1
P25705	ATP5A1	281.6	13.74	6	12					1
P61313	RPL15	129.11	14.71	3	6					1
P14866	HNRNPL	79.67	8.66	2	6					1
O43474	KLF4	79.16	14.42	4	7					1
P14868	DARS	159.96	10.18	3	6					1
P63104	YWHAZ	483.42	29.39	6	19	116.92	12.65	3	6	1
P49458	SRP9	85.4	12.79	1	2					1
Q9UKM9	RALY	62.63	15.69	3	5					1
Q13263	TRIM28	240.81	13.65	5	11					1
P04843	RPN1	25.33	2.47	1	2					1
Q01105	SET	98.09	9.31	2	4					1
Q96AB3	ISOC2	139.98	23.9	2	5					1
P22626	HNRNPA2B1	800.74	42.21	12	44	63.72	7.08	2	3	1
Q9HCD5	NCOA5	99.42	13.3	3	9					1
P35080	PFN2	72.93	10	1	2					1
P36551	CPOX	177.5	10.13	3	9					1
P17096	HMGA1	81.78	23.36	1	11					1
Q04695	KRT17	785.22	33.8	18	45	22.23	2.08	1	1	1
Q15424	SAFB	47.88	3.61	2	3					1
Q08378	GOLGA3	65.18	1.87	2	4					1
Q7Z5J4	RAI1	428.24	9.23	8	18					1
P98179	RBM3	270.94	35.67	3	13					1
P47755	CAPZA2	54.39	11.19	2	3					1
Q09028	RBBP4	69.91	9.65	2	3					1
Q9NYF8	BCLAF1	78.56	5.65	3	8					1
P37108	SRP14	180.85	19.12	2	5					1
P05556	ITGB1	63.79	1.25	1	2					1
P55327	TPD52	66.77	30.36	2	3					1
Q13185	CBX3	86.15	7.65	1	3					1
Q04941	PLP2	35.65	8.55	1	2					1
P23246	SFPQ	1339.05	37.2	24	92	87.67	2.12	1	2	1
Q13813	SPTAN1	36.43	0.77	1	2					1
P08779	KRT16	3142.94	58.56	31	150	58.33	3.81	2	3	1
P18621	RPL17-C18orf	118.16	21.2	4	8	26.42	4.89	1	1	1
Q9NQC3	RTN4	140.22	6.71	3	9					1
P09211	GSTP1	102.69	27.14	3	5					1
Q15149	PLEC	3389.79	25.58	88	175	1157.15	11.14	34	53	1
Q15056	EIF4H	32.96	14.92	2	3					1
P31943	HNRNPH1	422.08	13.36	4	11	39.66	3.56	1	1	1
Q15029	EFTUD2	73.43	7.1	4	6					1
P62304	SNRPE	43.8	17.39	1	2					1
P31948	STIP1	52.09	6.45	2	4					1
Q86V81	ALYREF	654.54	47.86	7	30					1
Q9H0U4	RAB1B	280.93	32.34	5	14	47.32	8.46	1	1	1
P04083	ANXA1	147.13	15.61	3	5					1
P23396	RPS3	375.6	46.09	9	26	133.72	12.76	3	5	1
P06454	PTMA	40.47	12.61	1	2					1
Q01130	SRSF2	110.25	18.1	2	3					1
O76094	SRP72	141.71	2.53	1	2					1
Q96M11	HYLS1	58.31	12.71	2	3					1
Q13242	SRSF9	25.61	8.14	2	2					1
P47895	ALDH1A3	106.87	15.04	4	8					1
P47897	QARS	50.05	2.32	1	2					1
P22234	PAICS	230.79	12.24	4	9	74.16	2.59	1	2	1
P04792	HSPB1	248.6	44.39	5	10	29.93	7.8	1	2	1
P61254	RPL26	27.5	6.21	1	2					1
Q14980	NUMA1	278.81	7.19	9	16					1
Q7KZF4	SND1	314.97	13.3	8	16	27.45	2.31	1	1	1
P51572	BCAP31	46.56	5.69	1	3					1
Q09666	AHNAK	393.77	13.67	20	42					1
Q14444	CAPRIN1	107.84	5.92	1	2					1
P38159	RBMX	494.97	27.62	11	29	81.85	7.67	2	4	1
P51610	HCFC1	134.96	5.7	7	8					1
Q9Y285	FARSA	23.9	2.17	1	2					1
Q9H307	PNN	53.49	6.14	3	7					1
P08865	RPSA	355.29	27.46	5	12					1
P13647	KRT5	696.91	25.25	15	47	35.45	1.53	1	1	1
P52815	MRPL12	25.83	23.23	2	2					1
Q07020	RPL18	343.64	29.26	6	15	157.02	12.23	2	4	1
P13010	XRCC5	35.09	5.6	2	4					1
P10809	HSPD1	1071.16	34.55	13	45					1
Q8WUM4	PDCD6IP	160.96	3.34	2	3					1
O14979	HNRNPDL	28.59	10.24	2	2					1
Q9Y2W1	THRAP3	456.84	9.74	6	20					1
Q5SW79	CEP170	2019.31	32.77	35	102					1
Q9Y230	RUVBL2	86.49	11.88	4	5					1
P49368	CCT3	30.53	8.99	2	3					1
P11387	TOP1	41.22	4.18	2	5					1
P63313	TMSB10	56.13	68.18	2	6					1
P13645	KRT10	3264.42	50.86	31	152	280.96	8.39	4	8	1
P62829	RPL23	605.91	40.71	6	22	120.33	12.86	1	3	1
P62820	RAB1A	186.24	26.83	4	8					1
Q1KMD3	HNRNPUL2	124.74	1.87	1	2					1
P62826	RAN	160.09	28.24	6	15	50.77	9.72	2	4	1
P07305	H1F0	76.03	7.22	1	2					1
P51991	HNRNPA3	474.27	23.28	8	32					1
P05787	KRT8	103.06	7.87	4	10	35.45	1.86	1	1	1
P05783	KRT18	400.35	35.12	9	16	40.21	2.09	1	1	1
Q8TAB7	Q8TAB7	20.81	22.94	1	2					1
Q96FV9	THOC1	3094.99	60.27	30	159					1
Q92598	HSPH1	29.48	2.1	2	2					1
P49756	RBM25	144.71	3.91	2	8	25.24	2.14	1	1	1
P61106	RAB14	98.37	19.07	2	5					1
P61513	RPL37A	113.63	19.57	1	2					1
P62081	RPS7	459.76	54.64	9	41	61.8	25.26	3	4	1
P62244	RPS15A	85.05	16.92	2	4					1
Q15836	VAMP3	41.87	24	1	2					1
Q96J01	THOC3	345.68	30.48	8	32					1
P68371	TUBB4B	1663.57	55.06	18	91	606.11	21.12	8	30	1
Q15847	ADIRF	61.72	71.05	2	6					1
O43707	ACTN4	306.65	10.21	7	11	48.82	3.51	3	3	1
P50990	CCT8	42.08	5.66	2	2					1
P34932	HSPA4	26.07	3.21	1	3					1
P51149	RAB7A	34.29	5.31	1	2					1
Q9Y2S6	TMA7	27.93	15.63	1	2					1
P18827	SDC1	50.21	5.48	1	2					1
P62424	RPL7A	358.92	30.08	8	17	122.65	15.04	3	4	1
P11940	PABPC1	84.25	6.29	3	4					1
O14974	PPP1R12A	55.44	7.09	5	7					1
P14618	PKM	1023.78	46.14	19	47	176.05	11.68	5	10	1
P08729	KRT7	479.39	36.25	13	31	171.18	16.42	6	7	1
Q8TDG4	HELQ	242.4	10.26	6	9					1
P42167	TMPO	28.14	6.39	2	2					1
P84243	H3F3A;H3F3B	222.42	47.79	5	22	66.65	13.24	2	5	1
P62906	RPL10A	100.06	16.13	4	8					1
P78371	CCT2	49.07	10.65	3	4					1
P02786	TFRC	152.91	3.95	2	3					1
P19338	NCL	1986.08	30	23	110	236.65	12.96	8	19	1
O00410	IPO5	82.33	2.28	1	3					1
Q15019	SEPTIN2	124.82	10.53	2	3					1
Q96PK6	RBM14-RBM4	216.96	14.35	7	14					1
P41091	EIF2S3	116.18	7.84	3	4					1
Q9Y266	NUDC	56.76	3.32	1	2					1
Q9Y265	RUVBL1	69.97	12.28	4	8					1
P35908	KRT2	1745.32	41.16	18	76	110.85	3.29	2	4	1
P62333	PSMC6	33.97	3.86	1	2					1
P49023	PXN	177.96	5.58	2	4					1
P39019	RPS19	270.7	37.24	7	17	58.62	20	3	4	1
Q9UHX1	PUF60	46.16	2.86	1	2					1
Q9H3N1	TMX1	92.56	8.21	2	3					1
Q15084	PDIA6	161.69	3.18	1	2					1
Q13148	TARDBP	214.91	7.25	2	3					1
Q8TBC3	SHKBP1	668.6	25.88	12	50					1
P08107	HSPA1A;HSPA	369.4	14.51	7	17	118.02	6.24	3	5	1
Q9NQY0	BIN3	33.47	5.14	1	2					1
Q15287	RNPS1	139.54	10.16	2	5					1
O75934	BCAS2	74.14	12.44	1	3					1
P60866	RPS20	193.2	25.21	4	15	44.31	22.69	2	3	1
Q16629	SRSF7	146.99	19.75	4	8					1
Q15233	NONO	1419.74	42.68	19	81	39.64	4.88	1	1	1
P48681	NES	61.19	1.17	2	2					1
Q12906	ILF3	195.73	10.4	6	9					1
Q12905	ILF2	42.03	5.13	1	2					1
Q8WWI1	LMO7	130.67	2.44	3	4					1
Q7L804	RAB11FIP2	503.66	36.13	11	26					1
P26599	PTBP1	26.0	11.49	3	5					1
Q07666	KHDRBS1	54.2	10.16	4	6					1
O43399	TPD52L2	46.92	14.56	1	3					1
O43390	HNRNPR	170.41	13.43	6	9					1
P12956	XRCC6	31.79	5.09	2	4					1
P09874	PARP1	224.61	4.83	4	7					1
Q9UQ35	SRRM2	381.76	5.7	10	20	40.37	0.51	1	1	1
P27816	MAP4	2072.39	41.15	37	128	207.45	6.51	5	10	1
Q00839	HNRNPU	1046.26	24.73	13	51	57.22	6.55	2	6	1
P06576	ATP5B	244.54	20.98	7	13					1
Q9Y224	C14orf166	123.94	12.3	2	3					1
Q13243	SRSF5	37.45	3.31	1	2					1
Q9NVA2	SEPTIN11	36.93	7.69	2	4					1
Q6I9Y2	THOC7	558.49	55.88	11	36					1
O75400	PRPF40A	74.46	7.21	5	8					1
P09234	SNRPC	89.08	13.21	1	3					1
P04350	TUBB4A	887.49	45.5	14	48	215.54	11.49	4	10	1
Q9Y6M1	IGF2BP2	73.52	6.51	3	3					1
Q13435	SF3B2	30.39	9.61	4	7					1
Q9Y3I0	RTCB	113.12	11.29	4	5					1
Q8IVT2	MISP	84.35	6.33	3	3					1
Q86W42	THOC6	1014.51	56.6	15	57					1
P36578	RPL4	200.45	22.72	6	17	53.6	7.73	2	3	1
P08727	KRT19	571.04	36.75	14	27	207.52	14.25	5	6	1
P46777	RPL5	147.23	24.58	6	11	20.75	4.38	1	1	1
Q99832	CCT7	86.26	2.21	1	2					1
P62258	YWHAE	215.44	30.2	7	16	67.3	3.92	1	3	1
Q8WXF1	PSPC1	395.24	20.84	7	19					1
Q14974	KPNB1	127.74	2.74	2	3					1
Q9NRW3	APOBEC3C	51.89	11.58	2	3					1
Q6P2Q9	PRPF8	49.96	2.23	2	3					1
P62158	CALM1;CALM	330.7	30.87	4	17	41.46	20.13	1	2	1
P60903	S100A10	122.14	52.58	4	11					1
P11021	HSPA5	326.68	15.75	8	16	90.07	3.52	2	4	1
P84103	SRSF3	101.39	23.17	3	10					1
P02545	LMNA	98.53	6.02	3	5	70.11	2.56	1	1	0.99
P62263	RPS14	291.1	33.77	6	21	116.58	31.79	4	7	0.99
P60660	MYL6	137.44	29.14	3	8	55.85	8.61	1	2	0.99
P62851	RPS25	125.12	15.2	2	7	79.06	7.2	1	2	0.98
P35268	RPL22	382.79	51.56	4	15	145.64	31.25	3	5	0.98
P60842	EIF4A1	507.55	31.77	7	22	203.34	13.3	4	8	0.97
P62249	RPS16	257.27	42.47	7	17	94.92	24.66	3	6	0.97
P63173	RPL38	264.23	32.86	3	12	67.46	32.86	2	4	0.97
P62913	RPL11	175.81	22.47	4	9	111.5	12.92	2	3	0.96
P50914	RPL14	134.17	17.21	3	4	52.53	6.05	1	1	0.96
P18124	RPL7	202.78	34.27	9	19	127.82	16.53	3	7	0.95
P62753	RPS6	273.6	16.06	4	11	54.77	17.27	3	4	0.92
P62750	RPL23A	180.75	16.03	3	6	106.38	8.33	1	2	0.92
P18669	PGAM1	70.64	17.32	3	6	60.52	5.51	1	2	0.92
P46781	RPS9	152.2	29.9	7	11	24.66	13.4	3	4	0.92
P30050	RPL12	121.59	24.24	3	6	40.06	9.7	1	2	0.92
P27348	YWHAQ	246.63	24.49	5	11	82.11	9.8	2	4	0.92
O00299	CLIC1	152.7	23.65	3	5	67.75	4.98	1	2	0.78
P67809	YBX1	342.86	31.17	4	15	217.78	20.37	3	6	0.74
